# Supplementary material for: Evidence of active subglacial lakes under a slowly moving coastal region of the Antarctic Ice Sheet
Source: Copernicus journal article supplement (doi:10.5194/egusphere-2024-1704), 2024-07-01
Supplement: Supplementary file [file egusphere-2024-1704-AC1-supplement.pdf]

# Response to Reviewers

## Evidence of active subglacial lakes under a slowly moving coastal region of the Antarctic Ice Sheet

Jennifer F. Arthur<sup>1</sup>, Calvin Shackleton<sup>1</sup>, Geir Moholdt<sup>1</sup>, Kenichi Matsuoka<sup>1</sup>, Jelte van Oostveen<sup>2</sup>

<sup>1</sup>Norwegian Polar Institute, 9296 Tromsø, Norway

<sup>2</sup>NORCE Norwegian Research Centre, 9294 Tromsø, Norway

Correspondence: Jennifer Arthur ([jennifer.arthur@npolar.no](mailto:jennifer.arthur@npolar.no))

Comments from the reviewers are given in black.

Our responses are given in blue.

Proposed amendments or additions to the revised manuscript are given in blue in the Times New Roman font.

### Acknowledgement

We would like to thank both Reviewers for their time and helpful input on our manuscript and their constructive feedback. We have answered their individual comments below.

### Referee Comment 1 (Anonymous)

RC1: 'Comment on egusphere-2024-1704', 06 Aug 2024

#### General comments

The study utilizes a novel data fusion of satellite data from ICESat, ICESat-2, and REMA strips, providing convincing evidence for the presence of active subglacial lakes in the coastal DML (Dronning Maud Land) region. Additionally, the authors integrate a stochastic analysis for subglacial water routing adding another novel analysis to demonstrate the uncertainty in water routing predictions. The discovery of active subglacial lakes in coastal DML and stochastic water routing adds new insights to the understanding of subglacial hydrology.

Weaknesses include the limited spatial scope of the study, undescribed methods regarding the stochastic water routing analysis (and unreleased code), and numerous technical mistakes outlined in the Technical Corrections section.

Thank you so much for taking the time to read and review our manuscript, and for your positive, thoughtful and constructive comments. In particular, we believe that your suggestions regarding our discussion of the stochastic water routing analysis have helped clarify the subglacial water flow section and will encourage and facilitate its use for other applications.

#### Specific comments

Throughout

You continually reiterate that height changes are inferred as subglacial volume changes; I think this repetition is unnecessary and clutters your manuscript; this method of inference is commonly used in other papers and does not need to be repeated ad nauseam.

We agree that this complicates the manuscript text in places, and we will simplify this when appropriate, especially in the Results section.

## 1 Introduction

- You do not explain the difference between active and stable volume lakes despite discussing both in your manuscript. Using a sentence or two to do so will help your reader.

Good point, we will add such a sentence to read: 'In contrast to hydrologically active lakes which fill and drain over decadal or shorter timescales, stable subglacial lakes predominantly detected from radio-echo sounding beneath the warm-based ice-sheet interior tend to be stable over  $>10^3$  year-timescales (Wright and Siegert, 2012; Livingstone et al., 2022)' in Section 2.1, where we first mention stable lakes.

## 3.3 Subglacial water flow

- Did you use a uniform melt rate or spatially variable melt rate (if spatially variable, which one)? The methodology is under described and quite important to interpreting your results.

We agree that the description of the methodology should be more specific here. We will add the following sentences to Section 2.6: 'The simulated bed grids used together with REMA ice surface elevations (Howat et al., 2019) to estimate gridded ice thicknesses and calculate subglacial hydraulic potential ( $\phi$ ) following Shreve (1972), which corresponds to each simulated bed. We assumed that water pressure equals ice overburden pressure, and predicted water routing along hydraulic potential gradients assuming a spatially uniform melt rate using a  $D_{\infty}$  algorithm (Tarboton, 1997). Subglacial stream probability was calculated from the number of streams predicted per grid cell over the ensemble of simulated bed'.

Figs. 2, 3, 4

- The secondary colormap you select for ICESat and REMA both have blue colors for the positive height anomalies (this is typical for subglacial lake and mass gain/loss papers); however, the colormap you select for ICESat-2 uses blue for negative height anomalies; this discrepancy makes the figures challenging to interpret; I suggest you reverse the colormap for the ICESat-2 data so that positive height anomalies correspond to the blue colors of red-blue colormap.

Thank you for this suggestion, we agree that this will improve the clarity of these figures and will update the ICESat-2 colourmap as suggested.

- Using a non-diverging colormap for ICESat and REMA height changes makes it unclear what color corresponds to zero, making height anomalies challenging to interpret. I understand the desire to have separate colormaps for each instrument (ICESat vs. ICESat-2), but this is accomplished by using the annotated ICESat/ICESat-2 track/RGT numbers. I would suggest a diverging colormap for both data sources (ICESat and REMA) and use annotation for ICESat tracks and ICESat-2 RGTs and the figure caption to communicate the gridded height changes are from REMA.

Thank you for this suggestion, we will modify these colormaps to be diverging, as suggested.

- (Fig. 2, but could be added to Figs. 3 and 4 too): In the figure caption, you should refer to ICESat-2 tracks as reference ground tracks (RGT) (vs. tracks) since you use 'RGT' in the figures' annotations; this will additionally help readers know which track belongs to which instrument.

This is a good suggestion, and we will change 'tracks' to 'reference ground tracks' to the clarify this in the captions of Figures 2-4.

### Technical corrections

Fig. 3

- a) Missing X-X' annotations to correspond with Fig. 3b

Thanks for catching this! We will add this label to Panel a of the figure.

- b) and e) you say profiles are relative to cycle (cyc) 3; however, you do not plot cyc 4; perhaps use a caption or methods to explain why this cycle is omitted from your analysis/plotting; perhaps use methods to explain why cyc 3 is the reference cycle (vs. something you might expect like cyc 1)?

We agree that this requires additional clarification. ICESat-2 cycles 1 and 2 are omitted because for these first two 91-day periods (October 2018-March 2019), the on-board software to point the central beam pair at the RGT was not configured correctly, so ICESat-2 measured tracks displaced from the RGTs by up to several kilometres. This problem was corrected at the start of cycle 3, in April 2019 (Smith et al., 2023). We propose to add a sentence to clarify this in the Methods Section 2.2.1: 'We omitted the ATL11 data collected between October 2018 and March 2019, because an issue with the central beam-pair pointing resulted in displacement of ICESat-2 measured tracks from the RGTs by up to several kilometres (Smith et al., 2023)'.

Ice surface elevations from Cycle 4 are not plotted because there was no useable data for this stretch of the reference ground track during this cycle (i.e. data was filtered out by the atl11\_qual\_summary flag as poor quality surface elevations, as detailed in the Methods Section 2.2.1). We will clarify this in the Figure caption with this additional sentence: 'Ice surface elevations from Cycle 4 are not plotted as these were removed by the data quality flag during initial data filtering'.

Line specific

10: "previously-identified lakes" should be "previously identified lakes" as compound adjectives of adverb and past participle are not hyphenated.

We will remove the hyphen as suggested.

10-11: "Most previously-identified lakes have been found upstream (>100 km) of fast-flowing glaciers in West Antarctica"

- Consider changing to 'fast-flowing ice' or fast-flowing ice streams' as much of the fast-flowing ice in West Antarctica are ice streams, not glaciers

Good point, we will change this to 'fast-flowing ice streams'.

24: "Hydrologically-active subglacial lakes..." "hydrologically active" does not need to be hyphenated because "hydrologically" is an adverb modifying the adjective "active." Adverbs ending in "-ly" and the adjectives they modify are typically not hyphenated.

We will remove the hyphen as suggested.

30: "...lakes can range from ~5 km<sup>2</sup> to tens of square kilometres"

- This statement is inaccurate as there are many active subglacial lakes in the hundreds or even thousands of square kilometers; consider some examples: Byrd\_2 is 725 km<sup>2</sup> and the largest lake, Nimrod\_2, is 1257.9 km<sup>2</sup> (Siegfried & Fricker, 2018)

Agreed, we will amend this to 'from ~5 km<sup>2</sup> to thousands of square kilometres' and will add this citation.

32-33: “Downstream subglacial water flow has been linked to cascading lake drainage events which transport excess water episodically towards the grounding line”

- I think there are earlier pub’s to cite for this point: Flament and others, 2014, Siegfried & Fricker, 2018

These are good relevant suggestions which we will add to this sentence.

39-40: “Over the past two decades, 140 active subglacial lakes have been detected...” This number is from the Livingstone and others, 2022 review paper, which does not include lakes from the Neckel and others, 2021 paper you cite elsewhere, which argues they have found more active lakes, so wouldn’t you say the detected number of active lakes is greater than 140?

We agree, and will modify this sentence to ‘over 140 active lakes...’ and add the Neckel et al. (2021) citation. Though Neckel et al. (2021) do not specify their exact number of new active lakes, they detect at least four distinct ice surface uplift and subsidence events, so for this reason we will update the sentence to indicate that at least 140 active lakes have been found.

45-46: “Few active subglacial lakes have yet been reported beneath much of the grounded ice close to the Antarctic Ice Sheet margin (Livingstone et al., 2022).”

- Perhaps ‘coastal’ is a better word instead of ‘margin’; active subglacial lakes are often described as being in the marginal fast-flowing ice regions vs. stable volume lakes that are the continental interior.

This is a fair point, and we will update this sentence in the Introduction for clarity as well as other instances throughout the manuscript where ‘margin’ is referred to. Instead of ‘margin’, we will instead use terms like ‘coastal’ and ‘grounding line’, depending on context.

55-57: “We further estimate subglacial stream probability using water routing analyses derived from stochastic simulation (Shackleton et al., 2023) to assess upstream drainage basins and potential downstream impacts of the newly observed subglacial lakes.”

- I read your manuscript as assessing drainage pathways (not basins as in the boundaries between basins or quantifying the areas/spatial extent of basins); I would change ‘basins’ to ‘pathways’ to reflect this.

We assessed probabilities of both drainage pathways and basin/catchment boundaries. We will make this clearer with a revised methodology section (Section 2.6) and a new supplementary figure (Fig. S4) that shows probabilities of both drainage pathways and catchment boundaries. See our response to Reviewer 2 for further details on this added material. To avoid confusion in the text here, before the methods are introduced, we will change ‘basins’ to ‘hydrological systems’ as a more general term. We further use the term catchment rather than basin when referring to hydrological drainage areas.

58: “previously-unreported active subglacial lakes”

- See comment for line 10

We will remove the hyphen as suggested.

71: “subglacial lakes 40 km or further inland” For American English this should be ‘farther’ since you are referring to a physical distance but I understand British English is more lax with the farther/further distinction.

We will change this to ‘farther inland’.

72: “(7.2-16.2° E)” longitude reference doesn’t seem useful to me.

These coordinates were provided as an indication of where the stable lakes detected in airborne radar by Goeller et al. (2016) are located, as shown in the main panels of Figure 1.

119: Described methodology contradicts Fig. 3 where you omit cyc4.

In Figure 3, ice surface elevations from Cycle 4 are not plotted because there was no useable data for this stretch of the reference ground track during this cycle (i.e. data was filtered out by the `atl11_qual_summary` flag as poor quality surface elevations, as detailed in the Methods Section 2.2.1). We will clarify this in the Figure caption with this additional sentence: ‘Ice surface elevations from Cycle 4 are not plotted as these were removed by the data quality flag during initial data filtering’.

122-23: Your citation for this sentence (Zwally and others, 2002) says footprints are 60 m, not ~65 m as you state; why the discrepancy? Is ~65 m estimate perhaps from post-mission launch analysis? If so, you choose a different citation or add a citation for that.

Thank you for pointing this out. The ICESat footprint is specified as ~65 m by Schutz et al. (2005), who provide an overview of the ICESat mission and a summary of calibration/validation experiments. Fricker and Padman (2006) and Siegfried and Fricker (2021) both also specify ~65 m, so we will remove the Zwally et al. (2002) citation and add these citations instead.

126-7: “...at the point between successive ascending and descending passes over the same location”

- would be clearer if you said point of “overlap” or “intersection”; “between” implies a gap *between* the ascending and descending passes.

We agree with the clarification and will modify this sentence to ‘... at the point where successive ascending and descending passes intersect’.

128: how is error lower than the range you report that includes flat surfaces?

We have checked the discussion of ICESat surface elevation errors in the reference cited in this sentence (Smith et al., 2009). They report crossover errors of ~0.075 m for flat surfaces which increase approximately linearly with surface slope, reaching 0.2 m for 1° slopes. Given most surface slopes in our study region are <0.5°, we expect that most errors are <0.1 m, which is within the range reported (0.075 – 0.2 m). We have modified the text to: ‘ICESat crossover errors (i.e. at the point where successive ascending and descending passes intersect) have been estimated between 7.5 cm for flat surfaces to 20 cm for 1° slopes (Smith et al., 2009), meaning most errors are <15 cm in our study region where slopes are typically <0.6° (Smith et al., 2009).’

136-8: “We further neglected potential long-term elevation changes due to surface mass balance and large-scale ice dynamics in the plane fitting as these are generally small in the study region and could interfere with changes due to subglacial lake activity.” A citation would be useful here especially since earlier in the manuscript you contradictorily say this region “has recorded significant ice-sheet thickening in DML over the last two decades (Smith et al. 2020) due to high snowfall rates (e.g. Boening et al., 2012).” (78-9)

Good point, but the magnitude is still an order of magnitude smaller than the signals we observe over lakes. We will add two citations from mass balance studies in our region that support this interpretation: Pratap et al. (2022), who showed only small temporal variability in SMB over three decades (1986–2017) across the Nivlisen Ice Shelf, and Goel et al. (2024), who report small temporal changes in SMB over two ice rises in the Fimbul Ice Shelf (west of our study region). The sentence will be revised to: ‘... as these are generally an order of magnitude smaller (Pratap et al., 2022; Goel et al., 2024) than the elevation anomalies we observe due to subglacial lake activity’.

150: Why is “Differencing” capitalized?

Thank you for catching this, we will update the section heading to be all lower case.

150-151: these two sentences seem contradictory: did you use ICESat elevation anomalies to select REMA strips or not? First sentence suggests not while the second sentence suggests yes. We agree that the ordering of these sentences could benefit from clarification. We propose re-wording them as: ‘Following detection of ICESat-2 surface elevation anomalies, we used high-resolution stereoscopic data from REMA (Howat et al., 2019) over these locations to further investigate subglacial lake activity and spatial extents. We differenced available DEM strips with 2-m map cells acquired between September 2015 and December 2021 that intersected regions with elevation anomalies identified in ICESat/ICESat-2 data to calculate surface height changes over three suspected lakes (L1, R1, R2: Table 1).’

171-174: I applaud you specifying your methods to delineate the lakes; most papers skip this important detail.

Thank you for this, and we agree on the importance of specifying these details in the methods.

601-2: I applaud JA and GM for releasing your ICESat/ICESat-2 analysis code; however, your team (CS and KM) could do more by releasing the code used to conduct the subglacial water routing stochastic simulations, especially considering this analysis relies on an open-source tool, GSatSim (Mackie and others, 2023); why not contribute more use cases to this project by releasing your code?

We agree that data availability is important and CS has now created a repository for the code used to simulate the ensemble of subglacial bed elevation grids and predict the subglacial water flow routing (<https://zenodo.org/records/13627356>). This DOI will be added to the data availability section.

596-599

- Data availability section lists a data repository DOI for the DML lake outlines; however, trying to download the outlines results in the following error: “Failed to authorize the download request.” (it’s not clear if the file embargoed; perhaps adding this to the dataset description would help those trying to access the files)

We have verified the DOI for the DML lake outlines and download seems to work without issue for multiple different users. We have now also archived the lake outlines and workflows for ice surface elevation data processing at Zenodo: <https://zenodo.org/records/13640820>.

- A similar data repository DOI is listed for the subglacial routing pathways however the DOI results in a ‘404 not found’ error. Thus the data sets produced from this work are currently inaccessible and *The Cryosphere* policy requires stating when they will be available and how they can be accessed until publicly available (“If the data are not publicly accessible at the time of final publication, the data statement should describe where and when they will appear, and provide information on how readers can obtain the data until then.” from [https://www.the-cryosphere.net/policies/data\\_policy.html](https://www.the-cryosphere.net/policies/data_policy.html))

We will update this to the correct DOI, which is <https://doi.org/10.21334/npolar.2024.b438191c>  
This should now work without issue.

382-83: “Ice thickness above these three lakes” in reference to Takahe Lakes (TL) below Haynes Glacier detailed in Hoffman and others, 2020 should be “four” lakes (See Fig. 1a or Supplement Fig. 1 to see four lakes).

Thank you for highlighting this, we will correct this to ‘four’ lakes.

391-3: This sentence could be clearer by stating that many marginal regions are predicted to have cold beds and selected a different citation to make this point:



- Pattyn and others, 2010 (doi:10.1016/j.epsl.2010.04.025) may be a better citation here as it has a figure of geothermal heat flow and likely warm/cold beds that would better illustrate your points related to geothermal heat flow and basal temperature and their Fig. 3c of mean basal melt rate that would bolster your point that the marginal DML region has a low probability of basal melt from modelling.

We agree that the point of this sentence would be made clearer by highlighting this and citing Pattyn (2010). We will modify the sentence to: ‘That these lakes are located so close to the ice margin beneath relatively slowly flowing ice is unexpected, since the ice-sheet bed is predicted to be cold beneath large parts of the Antarctic coastal region (Pattyn, 2010). In contrast, thawing ice-sheet bed is typically associated with low geothermal heat flow and ice flow speeds beneath thick ice and low surface mass balance at inland regions of Antarctica (Pattyn, 2010; Pattyn et al., 2016).’

406: “su1ggested” is misspelled

Thank you for catching this, we will amend to ‘suggested’.

425-7: You could cite subglacial sediment probability paper (Li and others, 2022, doi:10.1038/s41561-022-00992-5) to bolster argument that bed is likely permeable and you would not see seawater intrusion at these length scales here.

This is a good point, we will add the following sentence in this paragraph to dismiss the possibility that these elevation anomalies inland of Muninisen reflect seawater intrusion in the grounding zone: ‘In this region, the predicted presence of subglacial sedimentary basins in coastal DML suggests a permeable ice-sheet bed, meaning seawater intrusion is unlikely (Li et al., 2022).’

434: “quiescence (filling)”: parenthetical “filling” doesn’t make sense because quiescence is not filling or draining

Thank you for pointing this out, we will remove ‘quiescence (filling)’ for clarity.

435: “known active lakes” some would argue that the only active lakes we ‘know’ are those we’ve drilled to for in situ sampling; perhaps it’s better you stick with your previous terminology of “previously identified active lakes”

Agreed, we will modify this from ‘known’ to ‘previously identified active lakes’.

## Referee Comment 2 (Emma MacKie)

RC2: 'Comment on egusphere-2024-1704', 6th Sep 2024

### Summary

This study provides an updated account of active subglacial lakes in Dronning Maud Land from various satellite observations, with seven new lakes identified near the grounding line. Stochastic bed simulations are used to probabilistically model subglacial flowpaths and connect the lake drainage with ice shelf channels. Overall, this manuscript is nicely written with a sound methodology. The results are novel and will be of broad interest to TC readers.

Thank you so much Emma for taking the time to read and review our manuscript, and for your positive, thoughtful and constructive comments. In particular, we believe that your suggestions regarding a more detailed discussion of the methods have helped make this clearer in our

manuscript, especially to readers who are not very familiar with geostatistical methods for simulating subglacial topography.

I was excited to see geostatistical simulation being used here, but the methods require further elaboration. I made up the concept of using clustering to divide spatial domains into different variogram regions in order to account for non-stationary when using sequential Gaussian simulation (MacKie 2023), so this is by no means a standard and widely recognized method. While section 2.6 makes perfect sense to me, I suspect this description won't make much sense to most readers - even those familiar with geostatistics. As such, I recommend including a more detailed description of the method. Additionally: Which variogram model type was used? Why 12 clusters? Showing a map of the cluster boundaries might be helpful. Was the clustering based solely on spatial coordinates (lat, lon or x, y?), or were other variables used as well? It would also be nice to include an image of a topographic realization, or several realizations in the supplement.

There was some interpretation and discussion in the results section that should be moved to the discussion section.

Thank you for these helpful suggestions, and we agree that our description of the method would benefit from elaboration, as was also raised by Reviewer 1. We will update the description of the methods in Section 2.6, mainly the first paragraph which we suggest to read: 'To interpret the satellite-detected lake activity in the context of the broader hydrological system under the ice sheet, we mapped potential subglacial water drainage pathways and their uncertainty based on an ensemble of bed elevation grids generated through stochastic simulation (MacKie et al. 2020, 2021; Shackleton et al. 2023). We made a 1 km grid for the DML region, limited to ca.  $<73^{\circ}$  south to save computation time, and used ice thickness data from Frémand et al. (2023) as a basis for the simulations, after filtering out surveys conducted before 1990 which have limited locational accuracy. Bed elevations were calculated by subtracting ice thicknesses from ice surface elevations extracted from the 500 m REMA mosaic product (Howat et al. 2019), and we also added elevation data from rock outcrops at pixel centroids. To model measurement variance accounting for spatially varying characteristics of the bed we chose to divide the data into 12 regional clusters (Supplementary Fig. 3) using a k-means clustering algorithm on measurement coordinates (MacKie et al., 2023). The experimental variogram was calculated for normalized bed elevation values in each cluster, representing measurement variance for increasing lag distance in each region (Mälicke, 2022). We found best-fitting statistical models and parameters based on a least-squares analysis between exponential, spherical, and Gaussian model fits (Supplementary Fig. 3).'

We have also added two supplementary figures as suggested: (1) a map showing the data divided into 12 regional clusters using a k-means clustering algorithm, with associated variograms, and (2) three examples of simulated bed topography grids. We also include these figures below:



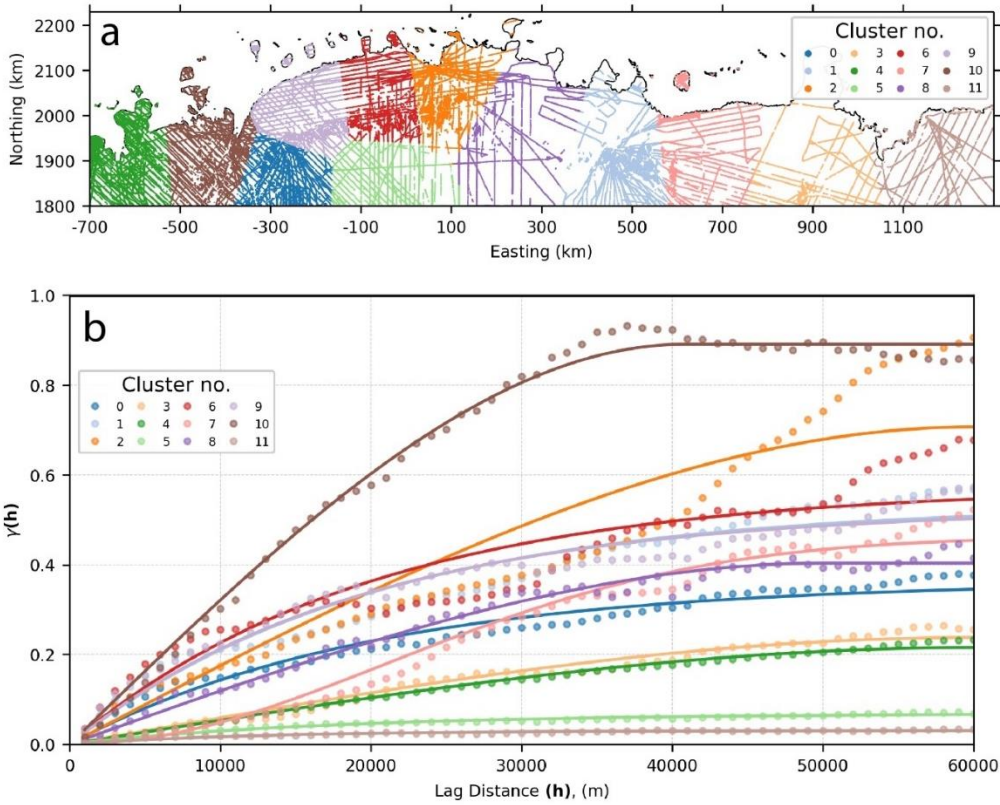

Supplementary Figure 3: Clustered bed elevation data and associated variograms. a) Map showing radar-survey derived bed elevation data divided into 12 regional clusters using a k-means clustering algorithm on measurement coordinates. Map is in a polar stereographic projection with true scale latitude of -71 and central longitude of 10 degrees. b) Experimental variogram (points) and modelled variogram (curves) are shown for normalised bed elevations in each of the 12 regions. The best-fitting model types are either exponential (clusters 0,5,6,9,11), spherical (clusters 1,2,3,4,8,10) or Gaussian (cluster 7).

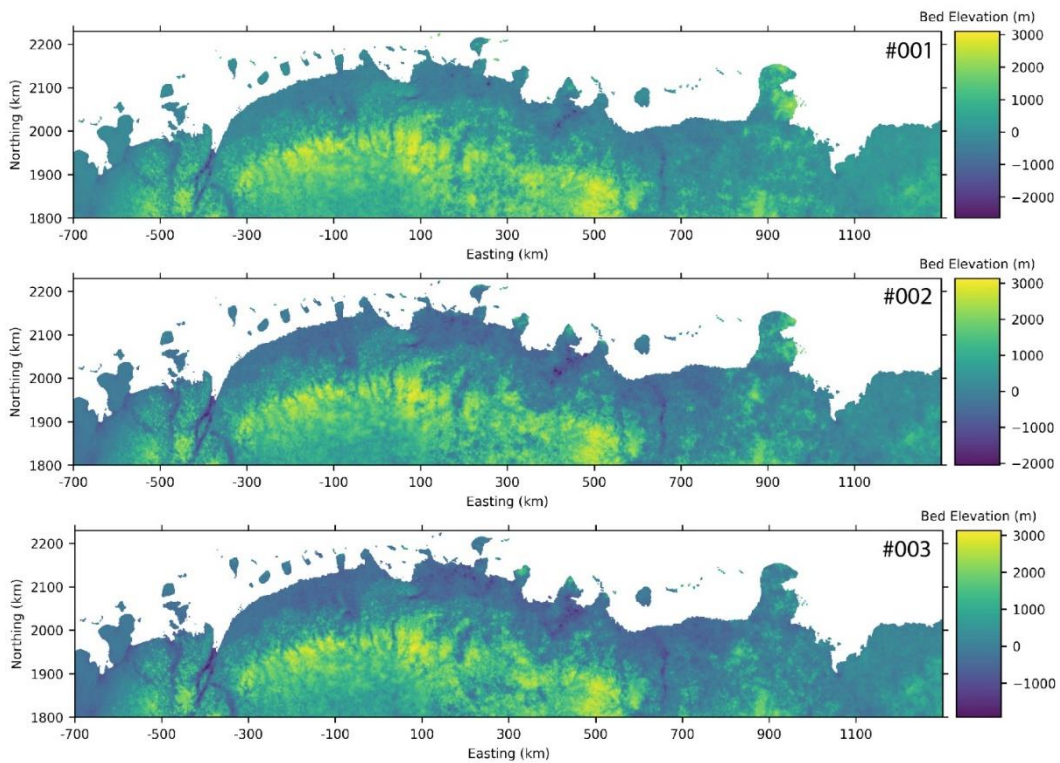

Supplementary Figure 7: Example simulated bed elevation results 001-003 out of the ensemble of 50 equally-likely grids. Map is in a polar stereographic projection with true scale latitude of -71 and central longitude of 10 degrees.

## Figures

Overall, the figures are complete and aesthetically pleasing.

I was a bit confused by the flight lines in Figure 1, which shows flight lines at latitudes above 72 degrees in part a, but shows <100 m bed uncertainty flight line shapes below 72 in part b. What do the lines in part a mean, if there was more radar data used in the interpolation? In the legend in part a, "Existing airborne radar data" is denoted by a light gray bar. However, the radar lines in the figure appear much darker. The active and radar detected lakes in the Antarctic map in the upper corners needs a legend. The Goeller et al. lakes are purple in the large panel, but turquoise in the Antarctic map, which is confusing.

Thank you for pointing these things out. The lines in part (a) denote flight lines where existing radar data have been collected. These were initially displayed within a radius of 100 km from the grounding line, but we realise this is misleading given that all available radar data were used in the interpolation. We will display all existing radar lines in the updated figure for clarity. We will also darken the gray bar used to denote 'Existing airborne radar data' in the figure legend, will add the active and stable lakes in the map inset to the figure legend, and will change the lake colours for consistency.

In figures 2 and 3, it's difficult to visually compare the ICESat and ICESat-2 colors because one uses a diverging colorbar and the other is a sequential colorbar. I'm also confused by the numbers on the colorbars. They are centered at 0, but aren't scaled the same way on either side?

This point was also raised by Reviewer 1, and we will modify the colorbars in these figures to be diverging and have re-labelled them to avoid confusion.

There are visual inconsistencies between the figures. For example, sometimes lake outlines are solid red, but in other figures they are dashed black lines. Dashed black lines are used to denote lake outlines, ice shelf channels, and grounding lines in different figures. In some figures, radar lines are purple, but in others they are grey. Sometimes the grounding line is solid yellow, sometimes it is dashed black, and sometimes it is solid black. I know this is sometimes unavoidable, but it would make the figures much more interpretable to have more continuity throughout the paper.

Sometimes figure parts are shown as a without parentheses and sometimes it's shown as (a). Make sure that figure parts are labeled according to the journal figure formatting requirements.

In all figures, we will display the grounding line as a solid black line, ice-shelf channels as short dashed black lines, and lake outlines as red. We will label all figure panels with brackets according to *The Cryosphere* requirements.

## Line comments

L45: "Few active subglacial lakes have yet been reported beneath much of the grounded ice close to the Antarctic Ice Sheet margin"

Can you specify what you mean by "close"? I thought that active lakes were generally close to the grounding line.

We will move a sentence from the Discussion that specifies this into this paragraph of the Introduction: 'Specifically, only ten active lakes have been identified previously within 50 km of the ice-sheet grounding line (Livingstone et al., 2022).'

L189: "...based on an ensemble of water routing analyses following the approach of Shackleton et al., (2023)."

May I humbly suggest that you cite MacKie et al. 2020 or 2021? These were the original studies to perform an ensemble geostatistical water routing analysis.

We will of course cite your 2020 and 2021 papers here, thank you for pointing this out.

L196: "... calculated the experimental variogram..."

I assume the SciKit-GStat package was used to do this, which should be cited:

Mälicke, M. (2022). SciKit-GStat 1.0: a SciPy-flavored geostatistical variogram estimation toolbox written in Python. *Geoscientific Model Development*, 15(6), 2505-2532.

We will cite Mälicke (2022) here, thank you.

L458: "Also, subglacial channels in these regions could also be ephemeral and only form during lake drainage events (Smith et al., 2017)"

Remove one "also".

We have removed the second "also" in this sentence.

## References

- Goel, V., Martín, C., Matsuoka, K.: Evolution of ice rises in the Fimbul Ice Shelf, Dronning Maud Land, over the last millennium. *Ant. Sci.*, 36(2), 2024, <https://doi.org/10.1017/S0954102023000330>.
- Li, L., Aitken, A.R., Lindsay, M.D. and Kulesa, B.: Sedimentary basins reduce stability of Antarctic ice streams through groundwater feedbacks. *Nature Geoscience*, 15(8), 645-650, <https://doi.org/10.1038/s41561-022-00992-5>, 2022.
- MacKie, E.J., Schroeder, D.M., Caers, J., Siegfried, M.R. and Scheidt, C.: Antarctic topographic realizations and geostatistical modeling used to map subglacial lakes. *J. Geophys. Res. Earth Surf.*, 125(3), <https://doi.org/10.1029/2019JF005420>, 2020.
- MacKie, E.J., Schroeder, D.M., Zuo, C., Yin, Z. and Caers, J.: Stochastic modeling of subglacial topography exposes uncertainty in water routing at Jakobshavn Glacier. *J. Glaciol.*, 67(261), <https://doi.org/10.1017/jog.2020.84>, 2021.
- Mahagaonkar A., Moholdt G., Glaude Q., Schuler T.V.: Supraglacial lake evolution and its drivers in Dronning Maud Land, East Antarctica. *J. Glaciol.*, 1-15. <https://doi.org/10.1017/jog.2024.66>, 2024.
- Mälicke, M.: SciKit-GStat 1.0: a SciPy-flavored geostatistical variogram estimation toolbox written in Python. *Geosci. Model Dev.*, 15(6), 2505-2532, <https://doi.org/10.5194/gmd-15-2505-2022>, 2022.
- Pratap, B., Dey, R., Matsuoka, K., Moholdt, G., Lindbäck, K., Goel, V., Laluraj, L., Thamban, M.: Three-decade spatial patterns in surface mass balance of the Nivlisen Ice Shelf, central Dronning Maud Land, East Antarctica. *J. Glac.*, 68(267), 2022, <https://doi.org/10.1017/jog.2021.93>.

# Evidence of active subglacial lakes under a slowly moving coastal region of the Antarctic Ice Sheet

Jennifer F. Arthur<sup>1</sup>, Calvin Shackleton<sup>1</sup>, Geir Moholdt<sup>1</sup>, Kenichi Matsuoka<sup>1</sup>, Jelte van Oostveen<sup>2</sup>

5 <sup>1</sup>Norwegian Polar Institute, 9296 Tromsø, Norway  
<sup>2</sup> NORCE Norwegian Research Centre, 9294 Tromsø, Norway  
*Correspondence to:* Jennifer Arthur (jennifer.arthur@npolar.no)

## Abstract

Active subglacial lakes beneath the Antarctic Ice Sheet provide insights into the dynamic subglacial environment, with implications for ice-sheet dynamics and mass balance. Most previously-identified lakes have been found upstream (>100 km) of fast-flowing glaciers in West Antarctica, and none in the coastal region of Dronning Maud Land (DML) in East Antarctica. The regional distribution and extent of lakes as well as their timescales and mechanisms of filling-draining activity remain poorly understood. We present local ice surface elevation changes in the coastal DML region that we interpret as unique evidence of seven active subglacial lakes located ~~near the~~under slowly-moving ice ~~near the grounding line-sheet~~ margin. Laser altimetry data from the ICESat-2 and ICESat satellites combined with multi-temporal REMA strips reveal that these lakes actively fill and drain over periods of several years. Stochastic analysis of subglacial water routing together with visible surface lineations on ice shelves indicate that these lakes discharge meltwater across the grounding line. Two lakes are within 15 km of the grounding line, while another three are within 54 km. Ice flows 17-172 m a<sup>-1</sup> near these lakes, much slower than the mean ice flow speed near other active lakes within 100 km of the grounding line (303 m a<sup>-1</sup>). ~~Our observations add to a previously under-represented population of subglacial lakes that exist beneath slow-flowing ice near the ice sheet margin.~~ Our results improve knowledge of subglacial meltwater dynamics and evolution in this region of East Antarctica and provide new observational data to refine subglacial hydrological models.

## 1 Introduction

Hydrologically-active subglacial lakes periodically store and release water beneath the Antarctic Ice Sheet and form a key component of the basal hydrological system. Active lakes are known to influence the dynamics of the overlying ice by reducing basal friction and periodically triggering short-term accelerations in ice flow (Stearns et al., 2008; Siegfried et al., 2016; Siegfried and Fricker, 2018; Andersen et al., 2023). Temporary accelerations in ice flow of up to ~10% have been linked to lake drainage events on Byrd Glacier, East Antarctica (Stearns et al., 2008), on Crane Glacier, the Antarctic Peninsula (Scambos et al., 2011), and on the Mercer and Whillans ice streams, West Antarctica (Siegfried et al., 2016). Individual active

30 subglacial lakes can range from ~5 km<sup>2</sup> to ~~tens-thousands~~ of square kilometres and have been shown to form connected networks over hundreds of kilometres (Fricker et al., 2007, 2009; Smith et al., 2009; Flament et al., 2014; [Siegfried and Fricker, 2018](#); Hodgson et al., 2022; Livingstone et al., 2022). Downstream subglacial water flow has been linked to cascading lake drainage events which transport excess water episodically towards the grounding line ([Flament et al., 2014](#); [Smith et al., 2017](#); [Siegfried and Fricker, 2018](#); [Smith et al., 2017](#); Neckel et al., 2021). Meltwater outlets at the grounding line discharge  
35 freshwater into sub-ice-shelf cavities, which according to models could enhance ice-shelf basal melting (Carter and Fricker, ~~2017~~[2012](#); Dow et al., 2022) and reduce sea-ice volume (Goldberg et al., 2023) and has also been shown to influence sediment fluxes (Lepp et al., 2022) and biogeochemical fluxes (Wadham et al., 2013). Therefore, observing active lakes using repeated satellite data is crucial to characterize subglacial hydrology and its impact on the ice-sheet-ocean system.

40 Over the past two decades, over 140 active subglacial lakes have been detected underneath the Antarctic Ice Sheet using satellite data (Fig. 1, [Neckel et al., 2021](#); Livingstone et al., 2022). Satellite radar and laser altimetry (e.g., ESA's CryoSat-2 and NASA's Ice, Cloud and Land Elevation Satellites ICESat and ICESat-2) has successfully been used to identify localised ice surface elevation changes on annual to decadal timescales, interpreted as subglacial lake filling and draining activity and corresponding changes in lake volume (e.g., Fricker et al., 2007, 2010; Smith et al., 2009). Even finer patterns of centimetre-  
45 scale ice surface elevation changes have been identified using differential synthetic aperture radar interferometry (DInSAR) and interpreted as evidence for transient subglacial water transport (Gray et al., 2005; Neckel et al., 2021; Moon et al., 2022). Few active subglacial lakes have yet been reported ~~beneath much of the grounded ice close to~~in the coastal region of the Antarctic Ice Sheet margin (Livingstone et al., 2022). Specifically, only ten active lakes have been previously identified within 50 km of the ice-sheet grounding line (Livingstone et al., 2022). Consequently, little is known about the subglacial hydrology,  
50 water routing and the impact on local ice dynamics at the transition between grounded and floating ice in this region.

In this study, we build on previous work by providing a more complete inventory of active subglacial lakes inferred from ~~by~~ measuring ice surface elevation displacement observed from ~~using~~ the laser altimeters onboard ICESat-2 between March 2019 and May 2023 and its predecessor ICESat between October 2003 and March 2009. We focus on the coastal Dronning Maud  
55 Land (DML) region of East Antarctica, where no active lakes have been identified previously (Fig. 1). We use ICESat and ICESat-2 elevation time series together with strip data from the Reference Digital Elevation Model of Antarctica (REMA; Howat et al. 2019) ~~strips~~ to determine the temporal patterns of subglacial lake activity and estimate lake volume changes. We further estimate subglacial stream probability using water routing analyses derived from stochastic simulation (Shackleton et al., 2023) to assess upstream drainage basins hydrological systems and potential downstream impacts of the newly observed  
60 subglacial lakes. The combination of these datasets reveals seven previously unreported active subglacial lakes that fill and drain over periods of multiple years and identifies the most probable pathways of meltwater released from lakes towards the grounding line. Our study provides insights into ~~an~~ active subglacial hydrological systems and potential subglacial outlets close to the ice sheet margin in the coastal region in ~~of~~ eastern Dronning Maud Land. This can help to better constrain how



subglacial lake activity regulates ~~water availability and flow conditions under the ice sheet~~ ice-sheet basal conditions and ice dynamics, as well as modifies ice-shelf cavity circulation and basal melting when meltwater is released at the grounding line.

## 2 Study Area, Data and Methods

### 2.1 Study Area

~~In the Dronning Maud Land (DML) sector of East Antarctica, previous work has identified a cluster of eight ice surface subsidence and uplift events between 2017-2020 ~160 km inland from Jutulstraumen Glacier using double differential synthetic aperture radar interferometry (DDInSAR) and ICESat-2 altimetry (Neckel et al., 2021). These vertical movements of the ice surface reached 14.4 cm and were interpreted as episodic subglacial lake drainage events with durations between 12 days and ~1 year, indicating cascading subglacial water over a ~175 km flow path (Neckel et al., 2021). The DML coastal region is also characterized by sparse radar detected, stable subglacial lakes. Goeller et al. (2016) found 33 locations with distinct characteristics in airborne ice-penetrating radar data that can be interpreted as subglacial lakes 40 km or further inland from the grounding line (7.2-16.2° E). So far, no active subglacial lakes have been recorded in the coastal region of DML within 160 km of the ice margin.~~ We focus on the coastal region of grounded ice in DML, extending along the Princess Astrid Coast and the Princess Ragnhild Coast up until the Roi Baudouin Ice Shelf (69° S to 72° S and 33° W to 6° E; Fig. 1). There are ~13 fast-flowing outlet glaciers along this coast (88 – 281 m a<sup>-1</sup>), which are surrounded by slowly moving ice (2-30 m a<sup>-1</sup>, Gardner et al., 2018). Grounded ice in this region of the ice sheet lies largely below present-day sea level (Morlighem et al., ~~2020~~2022; Frémand et al., 2023, Fig. 1). Satellite altimetry from ICESat/ICESat-2 has recorded significant ice-sheet thickening in DML over the last two decades (Smith et al. 2020) due to high snowfall rates (e.g. Boening et al., 2012). So far, no active subglacial lakes have been recorded in the coastal region of DML, but ~160 km inland near the onset of Jutulstraumen ice stream, west of our study region, a cluster of eight ice surface subsidence and uplift events between 2017-2020 were identified using double differential synthetic aperture radar interferometry (DDInSAR) and ICESat-2 altimetry (Neckel et al., 2021). These vertical movements of the ice surface reached 14.4 cm and were interpreted as episodic subglacial lake drainage events with durations between 12 days and ~1 year, indicating cascading subglacial water over a ~175 km flow path (Neckel et al., 2021). Stable subglacial lakes have also been detected from airborne ice-penetrating radar data at 33 locations in the inland of DML (Fig. 1, Goeller et al., 2016). In contrast to hydrologically active lakes which fill and drain over decadal or shorter timescales, stable subglacial lakes predominantly detected from radio-echo sounding beneath the warm-based ice-sheet interior tend to be stable over >103 year-timescales (Wright and Siegert, 2012; Livingstone et al., 2022).



## 2.2 Satellite Altimetry

### 2.2.1 ICESat-2

NASA's next generation Ice, Cloud, and land Elevation satellite (ICESat-2) is a photon-counting laser altimeter providing repeat-pass ice surface height measurements every 91 days (Markus et al., 2017). The Advanced Topographic Laser Altimeter System (ATLAS) on board ICESat-2 continuously profiles the Earth's surface along its 1387 reference ground tracks (RGTs) using six laser beams, which measure three pairs of tracks, with each pair separated by 3.3 km. The beams within each pair are separated by ~90 m. Elevation-change data in this paper are based on release 6 of the ICESat-2 Level 3b Slope-Corrected Land Ice Height time series (ATL11) product (Smith et al., [20222023a](#)) which became available in August 2023. We used the ATL11 data spanning between April 2019 and April 2023, for which the geolocation of each beam is accurately determined (Smith et al., 2023b). [We omitted the ATL11 data collected between October 2018 and March 2019, because an issue with the central beam pair pointing resulted in displacement of ICESat-2 measured tracks from the RGTs by up to several kilometres \(Smith et al., 2023b\).](#) All previous studies detecting subglacial lakes in Antarctica from ICESat-2 have used the lower-level ICESat-2 ATL06 product, which provides geolocated, land-ice surface heights that are corrected for geophysical impacts and instrument bias (e.g. Siegfried and Fricker, 2021; Neckel et al., 2021; Fan et al., 2022).

A main difference between ATL06 and ATL11 is that ATL06 elevations require slope correction using a DEM or data-fitted reference surface when comparing repeat-tracks, whereas this is already done as part of the ATL11 processing, [directly](#) providing time series of along-track ice surface heights that are slope-corrected onto a reference pair track (RPT) for each cycle and are accurate to <0.07 m (Smith et al., [20192023b](#); Brunt et al., 2021). In this way, ATL11 height estimates [have](#) [corrected](#) ATL06 heights for the combined effect of small cross-track offsets (up to ~130 m) between repeat measurements and sub-kilometre and surface topography around fit centres. The ATL11 product has so far been used in Antarctica for assessing the impact of net snow accumulation variability on observed surface height change (Medley et al., 2022) and for investigating ice-shelf basal channel morphology at the Kamb Ice Stream grounding line (Whiteford et al., 2022). Over the Greenland Ice Sheet, ATL11 has been used for evaluating spatial patterns of surface mass balance and firn densification (Smith et al., 2023b) and for investigating subglacial lake activity beneath the [surface](#) ablation zone (Fan et al., 2023).

Two types of height error estimates are provided with ATL11. One is random per-point estimates ( $h_{corr\_sigma}$ ), which include the errors related to the accuracy of the reference surface and the precision of the ICESat-2 range estimates and are uncorrelated between adjacent reference points (Smith et al., 2023b). The other is systematic error estimates ( $h_{corr\_sigma\_systematic}$ ), which include the slope-dependent impact of geolocation errors that are correlated along each track. We find maximum per-point error and systematic error in the corrected surface heights of 14.9 cm and 14.5 cm respectively for the ICESat-2 data we analyse here. These maximum values are higher than reported per-point errors in the ice-sheet interior of 1-2 cm, because rougher, steeper surfaces towards the coast typically degrade the instrument precision and

slope correction (Smith et al., 2023b). However, the mean per-point and systematic errors for the ICESat-2 data analysed here are still as low as 2.7 cm and 5.3 cm, respectively.

To investigate subglacial lake drainage and filling patterns, we followed the approach of calculating repeat-track elevation anomalies (Fricker et al., 2014; Neckel et al., 2021; Siegfried and Fricker, 2018; 2021). We first removed poor-quality surface elevations, potentially caused by cloud cover, blowing snow or background photon clustering based on ATL11's overall quality summary flag (*atl11\_qual\_summary* == 0) (Siegfried and Fricker, 2021). Previous studies have calculated elevation anomalies with respect to a DEM or other reference surface (Fricker et al., 2014; Neckel et al., 2021). Using [the slope-corrected ATL11](#), we assessed ice surface elevation changes directly with respect to the start of our observation period (April 2019) by calculating elevation anomalies ( $dh$ ) for each ATL11 point along every RGT relative to the first available cycle ( $h_0$ ) using:  $dh = h - h_0$ , where  $h$  is ice surface elevation. We calculated time series of elevation anomalies along each RGT.

### 2.2.2 ICESat

NASA's Ice, Cloud, and land Elevation satellite (ICESat) was a laser altimeter providing ice surface height measurements in footprints of ~65 m-diameter separated by ~172 m along its RGTs ([Zwally et al., 2002](#); [Schutz et al., 2005](#); [Fricker and Padman, 2007](#)). We used ICESat GLA12 ice-sheet product version 34 collected between February 2003 and October 2009 to derive elevation changes. ICESat RGTs were typically repeated within ~150 m cross-track distance, and vertically accurate within a few tens of centimetres depending on surface slope (Brenner et al., 2007; Kohler et al., 2012). ICESat crossover errors (i.e. [at the point where successive ascending and descending passes intersect at the point between successive ascending and descending passes over the same location](#)) have been estimated between 7.5 cm for flat surfaces to 20 cm for 1° slopes ([Smith et al., 2009](#)), meaning most errors are [<0.1-15 cm given the minimal surface slopes over most of the Antarctic Ice Sheet \(Smith et al., 2009\)](#); [in our study region where slopes are typically <0.6° \(Smith et al., 2009\)](#). The GLA12 product was used for compiling the first comprehensive Antarctic inventory of 124 active subglacial lakes north of 86° S, demonstrating short-term basal hydrologic evolution of lakes throughout Antarctica (Smith et al., 2017).

We estimated along-track elevation changes from GLA12 following the approach of Moholdt et al. (2010) by fitting surface planes to 700 m segments of repeat track data, determining surface elevation anomalies for all laser footprints with respect to the plane fit. Outlier points with elevation anomalies >10 m, for example due to cloud scattering or rough topography, were iteratively removed in the plane-fit processing. This threshold was set higher than the expected elevation changes due to subglacial lake activity, in order to not remove such data. We further neglected potential long-term elevation changes due to surface mass balance and large-scale ice dynamics in the plane fitting as these are generally [an order of magnitude smaller small in the study region \(Pratap et al., 2022; Goel et al., 2024\) than the elevation anomalies we observe and could interfere with changes](#) due to subglacial lake activity.

### 2.3 Subglacial lake detection

Previous studies have identified lakes based on thresholds between  $\pm 0.1$ - $0.5$  m for spatially-coherent elevation anomalies using ICESat (Fricker et al., 2007, 2014; Smith et al., 2009) and Cryosat-2 (Kim et al., 2016; Smith et al., 2017, Malczyk et al., 2020). We adapted these previous approaches to our coastal study region, which is characterized by high slope and roughness, by identifying potential areas of subglacial lake activity from ICESat/ICESat-2 repeat-tracks with significant ( $\pm 1$  m) elevation anomalies over a distance of  $\geq 1$  km. The elevation anomaly patterns over these areas were then manually examined to assess whether these appeared to reflect lake activity (i.e., arc-shaped profiles of draining and/or filling) or if they were in, for example, highly-crevassed or sloping regions where unresolved rough topography is likely to dominate the signal. We found [that](#) using a  $\pm 1$  m threshold applied to elevation anomalies relative to the start of our observation period best highlighted and distinguished substantial localised anomalies from background along-track elevation changes and noise, whereas lower thresholds (e.g.  $\pm 0.5$  m) included surface elevation change signals that are unlikely to be related to subglacial lake activity.

### 2.4 REMA ~~sStrip~~ ~~dD~~ifferencing and lake outlines

[Following detection of ICESat-2 surface elevation anomalies, we used high-resolution stereoscopic data from REMA \(Howat et al., 2019\) over these locations to further investigate subglacial lake activity and spatial extents. We differenced available DEM strips with 2-m map cells acquired between September 2015 and December 2021 that intersected regions with elevation anomalies identified in ICESat/ICESat-2 data to calculate surface height changes over three suspected lakes \(L1, R1, R2: Table 1\). To further investigate subglacial lake activity and spatial extents, we used high resolution stereoscopic data from REMA \(Howat et al., 2019\) over the locations where we detected ICESat 2 anomalies in surface elevation change. We differenced available DEM strips with 2 m map cells acquired between September 2015 and December 2021 that intersected regions with elevation anomalies identified in ICESat/ICESat 2 data to calculate spatial ice surface height changes over three suspected lakes \(L1, R1, R2: Table 1\).](#) The number of useable DEM strips (i.e. partially or fully covering each lake) in any given year averaged between 1 and 3 strips per lake (Supplementary Fig. 1). The strip DEMs are generated by applying fully-automated, stereo auto-correlation techniques to overlapping pairs of high-resolution optical satellite images, using the open-source Surface Extraction from TIN-based Searchspace Minimization (SETSM) software (Howat et al., 2019). Individual 2-m REMA strips are not co-registered to satellite altimetry, unlike the REMA mosaic (Howat et al., 2019), meaning that relative elevation within a strip is precise but has low absolute accuracy (Hodgson et al., 2022). To increase absolute accuracy, DEM strips can be coregistered using static reference points, typically rock outcrops (Shean et al., 2019). The strips we used do not include any outcrops, so instead we estimated and removed vertical elevation biases by using the temporally closest overlapping ICESat-2 track within  $\pm 100$  days of the DEM strip acquisition date (Chartrand and Howat, 2020; Priergaard Zinck et al., 2023). This time restriction ensures that the ~~ICESat 2~~REMA elevations are representative ~~for the of elevations during~~ strip acquisition ~~time~~, although we acknowledge that some lake filling or drainage could still occur within this time period.

Of the ten DEM strips that intersected the seven potential areas of subglacial lake activity we identified, six strips were vertically co-registered to ICESat-2 elevations (Supplementary Table 1). The other four strips were not co-registered due to lacking contemporaneous ICESat-2 data, but were still included to provide further insight into the lake activity of Lakes L1 and R1 (Supplementary Fig. 2). In these cases, the remaining vertical biases are reflected in near-constant elevation differences outside of the active lake areas. Static lake boundaries were digitized from the pattern of elevation anomalies in the REMA difference maps (Lakes L1, R1 and R2). We were unable to estimate the areas of four lakes (M1, M2, V1, R3) because the REMA strip differences did not show any significant elevation anomalies. For illustrative purposes, we still sketched speculative lake boundaries for these four lakes (Fig. 2d-e) based on ICESat-2 elevation anomaly locations and the REMA mosaic hillshade (Howat et al., 2019).

## 2.5 Subglacial lake volume changes and recharge rates

To estimate lake volume changes, we multiplied the REMA-derived lake areas (where available) with the altimetry-based median elevation anomaly within this lake boundary for each repeat track (Smith et al., 2009; Carter et al., 2011). We approximated subglacial water flux by the volume change corresponding to ice surface uplift/deflation over time (Malczyk et al., 2020, 2023). Recharge rates (reported as annual water supply to each lake) were estimated by applying linear regression against volume change and time during the refilling (inter-drainage) period, following Malczyk et al. (2020). We were unable to estimate volume changes for the five lakes without a clear or complete lake boundary in the REMA data. In the absence of further constraints on lake extent changes over time, we assume a constant lake area throughout the fill-drain cycle and a constant overlying ice thickness (Fricker and Scambos, 2009), even though migrating lake boundaries through fill-drain cycles can impact the estimated lake volume changes (Siegfried and Fricker, 2021).

## 2.6 Hydropotential Subglacial Water Flow Mapping

To interpret the satellite-detected lake activity in the context of the broader hydrological system under the ice sheet, we mapped potential subglacial water drainage pathways and their uncertainty based on an ensemble of bed elevation grids generated through stochastic simulation (water routing analyses following the approaches of MacKie et al. (2020, 2021); and Shackleton et al. (2023). We made a 1 km grid for the DML region, limited to ca. <math>73^\circ</math> south to save computation time, and used ~~We made a 1 km grid for the DML region, limited to ca. <math>73^\circ</math> south to save computation time, and calculated the probability of each grid cell to contain subglacial streams. We did this by first generating 50 equally likely bed topography grids with continuous, realistic roughness simulated between radar derived ice thickness measurements using a sequential Gaussian simulation algorithm (MacKie et al., 2023). Ice thickness data from Frémand et al. (2023) were used as a basis for the simulations, after filtering out surveys conducted before 1990 which have limited locational accuracy, and converting to bed elevations were calculated data~~ by subtracting ~~it~~ ice thicknesses from ~~ice extracted~~ surface elevations ~~extracted of from~~ the 500 m REMA mosaic product (Howat et al. 2019), ~~and~~ ~~w~~we also added elevation data from rock outcrops at pixel centroids ~~of the REMA 500 m grid (Howat et al. 2019). To model measurement variance accounting for spatially varying characteristics~~

220 of the bed. We chose to divide cluster the region data into 12 regions clusters (Supplementary Fig. 3X) using a k-means  
clustering algorithm on measurement coordinates (MacKie et al., 2023). and calculated the experimental variogram was  
calculated using the SciKit-GStat python package (Mälicke, 2022) for normalised measurements bed elevation values in each  
cluster, giving measurement variance for increasing lag distance in each region. which we used to fit found best-fitting a  
225 spherical (clusters 1,2,3,4,8,10), and Gaussian (cluster 7) model fits (Supplementary Fig. 3X).

representing measurement variance at increasing lag distances in each regional cluster (Mälicke, 2022). This was done to  
sequentially We generated an ensemble of 50 equally-likely bed elevation grids using a sequential Gaussian simulation  
algorithm from the GStatSim python package (MacKie et al., 2023), which simulates values bed elevations between  
230 measurements along a randomized path over the domain, by picking from a Gaussian distribution conditioned at each grid cell  
by the closest 50 bed elevation measurements and modelled variance. The resulting ensemble of 50 bed elevation grids were  
then used to estimate subglacial hydraulic potential ( $\phi$ ) following Shreve (1972). We also used the median absolute deviation  
(MAD) between the 50 simulated bed elevation grids as a measure of bed elevation uncertainty. Low MAD is associated to  
regions with a high data density and lower basal roughness, whereas high MAD occurs for large distances between to the  
235 nearby survey profiles and in regions with high basal roughness where there is greater potential for bed elevation variability  
between measurements (Shackleton et al., 2023). Figure 1b shows where the MAD is lower than 100 m, indicating regions of  
relatively low bed uncertainty and higher confidence in simulated subglacial water routing.

The simulated ensemble of 50 bed grids elevation grids were used together with REMA ice surface elevations (Howat et  
240 al., 2019) to estimate gridded ice thicknesses and calculate subglacial hydraulic potential ( $\phi$ ) following Shreve (1972), which  
corresponds to each simulated bed. We assumed that water pressure equals ice overburden pressure, and calculated predicted  
water routing for along hydraulic potential gradients assuming a spatially uniform melt rate based on a depression filled bed  
topography using a  $D_{\infty}$  algorithm (Tarboton, 1997). Subglacial stream probability was calculated based on from the number of  
predicted streams predicted per grid cell over the ensemble of simulated bed topography elevation grids. This method approach  
245 provides uncertainty-constrained water routing predictions where uncertainty can be sourced either from a lack of  
measurements (i.e. topography is not known well-enough), lack of strong topographic control on water flow, or both. Low  
probability streams are therefore associated to regions with sparse data or in flat areas where water routing is sensitive to minor  
fluctuations in bed elevation between simulations. We similarly derived the probability of subglacial hydrological catchment  
boundaries using the drainage basins for streams predicted in water routing analyses over the simulated bed. We then further  
250 estimated the ensemble-average upstream subglacial hydrological catchment area potentially draining towards for each  
altimetry-detected lake, based on the average upstream watershed area generated from our water routing analyses and derived  
catchment boundary probabilities based from the ensemble on the 50 stochastic simulations (Supplementary Fig. 64).

### 3 Results

#### 3.1 Observed ice surface displacements and interpreted lake activity

255 We identify seven locations with significant ( $>1$  m) anomalous, repeated surface elevation changes over distances of a kilometre or more from ICESat/ICESat-2 repeat tracks, which we interpret as active subglacial lakes. Lake R1 is located 19 km upstream from the Roi Baudouin Ice Shelf grounding line and is crossed by two intersecting ICESat-2 tracks and one ICESat track that all show a  $\sim 5$ -km wide elevation anomaly (Fig. 2a, Table 1). Lake L1 is 32 km upstream of the Lazarev Ice Shelf and is crossed by two ICESat tracks and two ICESat-2 tracks (Fig. 2b). Lake R2 is 115 km inland from the Roi Baudouin  
260 Ice Shelf and is crossed by only one ICESat-2 track (Fig. 2c). Lake V1 is located 54 km upstream of the Vigridisen Ice Shelf and is crossed by two intersecting ICESat-2 tracks (Fig. 2d). Lakes M1 and M2 are only 10 km apart, and 5 km and 15 km upstream of the Muninisen Ice Shelf, respectively (Fig. 2e). Lastly, Lake R3 is 136 km inland from the Roi Baudouin Ice Shelf and is crossed by one track (Fig. 2f), which shows a  $\sim 7$ -km wide elevation anomaly (Supplementary Fig. [3d5d](#)).

265 Following Smith et al. (2009), we classify ‘high-confidence’ active lakes as being detected from elevation anomalies in at least two intersecting reference tracks, and lakes that are only identified from one satellite altimetry track as ‘provisionally active’. By this definition, five of the lakes (R1, L1, V1, M1 and M2) are classified as high-confidence, and two (R2 and R3) as provisionally active. However, we can independently detect localised elevation anomalies over Lake R2 from REMA strip differencing, supporting that this is an actively filling and draining lake. Three of the seven lakes were confirmed and delineated  
270 by REMA strip differencing during 2019-2021 (Fig. 4; L1, R1, R2) and two of these also had intersecting ICESat tracks to extend the change record back to 2003-2009 (Fig. 3 and 5; L1 and R1). Their lake areas range from 21.5 to 40.1 km<sup>2</sup> (Table 1). The other four lakes (V1, M1, M2, R3) had no ICESat data and no detectable change between REMA strips, likely due to negligible elevation changes between the dates covered by the strips.

275 All seven active lakes are located below sea level and beneath ice thicknesses of 800-1500 m (Fig. 1b). These lakes are typically located in relatively slow-flowing regions: two lakes under 20 m a<sup>-1</sup>, three lakes between 60-90 m a<sup>-1</sup>, and two beneath slightly faster-flowing tributaries at 152 and 172 m a<sup>-1</sup> (Fig. 1b, Table 1). The lakes located close to ice flow divides are beneath especially slow-flowing ice, for example Lake L1 (Fig. 1b, Table 1). The lakes upstream of Vigridisen and Muninisen ice shelves are located beneath faster-flowing outlet glaciers (up to 170 m a<sup>-1</sup>; Gardner et al., 2018).

280 We assume a one-to-one ratio between ice surface elevation changes and lake volumetric change, following previous studies in Antarctica and Greenland (Smith et al., 2009, Malczyk et al., 2023, Fan et al., 2023). It is possible that some ice surface uplift and subsidence could be influenced by ice-flow dynamics, blowing snow and changes in basal traction, resulting in misinterpretation as subglacial lake activity (Sergienko et al., 2007; Humbert et al., 2018), so this relationship lacks precise  
285 quantification (Siegfried and Fricker, 2018). For example, in fast-flowing regions, surface-elevation changes can reflect ice-



flow changes triggered by water displacement at the bed during lake drainage (Smith et al., 2017). Most of the lakes in this study are beneath relatively slow-flowing ice ( $< 100 \text{ m a}^{-1}$ ), making it unlikely that observed ice surface changes resulted from ice flowing into basal topographic depressions. The patterns of surface elevation change we observe are characteristic of subglacial lake drainage (i.e. deepening towards the lake centre) and lack uplift near localised subsidence, which can be a signal of ice dynamical changes (Carter and Fricker, 2012). We also note that lake widths (inferred from elevation anomaly widths) are large relative to ice thickness (e.g. L1:  $\sim 8.5$  ice thicknesses, R1:  $\sim 4$  ice thicknesses), whereas ice-dynamical effects tend to dominate only when lakes are small relative to ice thickness (Fricker and Scambos, 2009). Ice surface changes over our newly-identified lakes (up to 4.5 m) are much larger than those related to wind-driven snow redistribution and firn compaction, typically  $< 0.5 \text{ m a}^{-1}$  based on repeat-track elevation changes elsewhere in the region. Furthermore, the spatial co-occurrence between altimetry- and REMA-derived elevation anomalies and predicted subglacial stream locations (Section 3.3) gives us confidence that subglacial meltwater drains towards the observed lakes and that elevation changes are therefore due to subglacial lake activity rather than other surface changes. Therefore, we conclude that the ice surface elevation changes we observe reflect changes in water volume rather than ice dynamics and surface processes, although we acknowledge that actual lake volume changes are still uncertain due to potential migration of lakeshore boundaries through fill-drain cycles (Siegfried and Fricker, 2021).

### 3.1.1 Lake L1 upstream of Lazarevisen

Over Lake L1 we find steady ice surface subsidence between August 2020 until May 2023 (Fig. 3d-f), suggesting a lake drainage event over a period of at least 2 years and 8 months. This is preceded by a slight ice surface uplift between May 2019 and May 2020, indicating lake refilling. REMA data show slight subsidence beside these tracks during September 2015 – December 2016 and January 2020 – February 2021, suggesting overall lake volume loss during these two periods (Fig. 4c, Supplementary Fig. 4b2b). This is consistent with the time series of lake volume derived from ICESat-2, showing the lake steadily draining between May 2020 and May 2023 (Fig. 3f). Elevation anomalies along the two intersecting ICESat tracks continue for 5 km along Track 134 and 7 km along Track 215, reaching a maximum value of 3 m at the lake centre (Fig. 3d-e, Supplementary Fig. 4a6b). The lake-averaged elevation anomaly time series over Lake L1 (Fig. 5) reveals positive elevation anomalies from November 2003 to March 2007 followed by a large ( $> 3 \text{ m}$ ) subsidence over the next 1 year and 8 months, indicating lake drainage. Ice surface displacements show a distinct minimum at the lake centre that tapers out towards the lake edges.

### 3.1.2 Lakes R1, R2 and R3 upstream of Roi Baudouin

The time series of elevation anomalies from ICESat-2, ICESat and REMA strip differencing show variable drain and/or fill patterns for these three lakes over the past two decades (Figs 3 and 5). The elevation time series for Lake R1 shows negative anomalies up to  $-2.4 \text{ m}$  in December 2019, followed by a gradual elevation increase to up to  $4.5 \text{ m}$  in March 2023 (Fig. 3a-b), likely representing ~~We interpret this as ice surface subsidence in response to~~ lake drainage, followed by uplift in response to

the lake filling over the next 3 years and 5 months. This is consistent with observed elevation gain (lake filling) from REMA differencing between October 2019 and January 2021 (Fig. 4a). Earlier REMA data indicate a slight subsidence (lake drainage) between December 2016 and December 2017 (Supplementary Fig. 2a), just ahead of the ICESat-2 observed subsidence in 2019. Time series of lake volume change shows the lake steadily filling between April 2019 and March 2022 (Fig 3c). More than a decade earlier, ICESat repeat tracks show a steady subsidence across the same area between 2003 and 2009 (Fig. 5, Supplementary Fig. 4b6a), which we interpret as a sign of lake draining. ICESat-2 data show that Lake R2 was draining between May 2019 and April 2021, and has since been filling through to April 2023 (Supplementary Fig. 3e5c). The shape of the lake can be seen from a distinct pattern of uplift between two REMA strips from January 2021 and December 2022 (Fig. 4b). Lastly, over Lake R3 we find continuous-gradual ice surface uplift from August 2019 to April 2023 in response to lake filling (Fig. 5).

### 3.1.3 Lakes V1, M1, M2 upstream of Vigridisen and Muninisen

We record gradual subsidence up to -1.6 m ice surface subsidence over Lake V1 from August 2019 to May 2023, which we interpret as continuous-indicating a slow lake drainage (Fig. 5, Supplementary Fig. 3a5a). We find continuous A gradual lake filling over 4 years is apparent from ice surface uplift along a ~2.5-km wide zone of Lake M1 from May 2019 until May 2023; suggesting lake filling over 4 years (Fig. 5, Supplementary Fig. 3b5b). Likewise at Lake M2, lake refilling is found to occur over a ~3 year and 8-month period we found continuous as indicated by ice surface uplift along a ~3-km wide elevation anomaly from September 2019 to June 2023; indicating lake refilling during this ~3 year and 8-month period (Fig. 5, Supplementary Fig. 3b5b). There is a striking coherence between the filling rates of these two lakes during the ICESat-2 period. Without any further intersecting altimetry tracks or clear change patterns in REMA strips for these lakes, it is difficult to constrain their areas and volume changes. The lack of significant localised elevation changes from REMA differencing could be because they had just drained and not yet refilled in the period covered by the DEM strips, or that draining and refilling have roughly balanced each other.

### 3.2 Subglacial lake volume changes, recharge rates and water flux

We calculated annual water supply and recharge rates for lakes R1 and L1, where lake boundaries were fully delineated from REMA strip differencing (Fig. 4). Lake R1 steadily gained volume from December 2019 to January 2023 before starting to drain (Fig. 3c, Fig 5). The associated volume gain of 0.13 km<sup>3</sup> over 3.5 years corresponds to a yearly recharge rate of 0.03 km<sup>3</sup> a<sup>-1</sup>. Lake L1 gained 0.01 km<sup>3</sup> volume between February 2020 and August 2020 before starting to drain until May 2023 (Fig. 3f). During this half-year period, Lake L1 recharged at a rate of 0.02 km<sup>3</sup> a<sup>-1</sup>. Similarly-sized active lakes have been suggested to recharge at similar rates to those reported here, for example Lake Cook E2 (46 km<sup>2</sup>, 0.05 km<sup>3</sup> a<sup>-1</sup>) and Lake Whillans 2b (25 km<sup>2</sup>, 0.02 km<sup>3</sup> a<sup>-1</sup>) (Li et al., 2020; Malczyk et al., 2020). Our estimated lake volume gains and losses are of similar magnitude to the median lake volume change of ~0.12 km<sup>3</sup> for 140 active lakes around Antarctica based on their surface elevation histories

(Livingstone et al., 2022). However, since we are unable to capture a full drainage or filling cycle for most lakes, actual lake  
350 volume changes between minimum and maximum states are likely higher than what we can capture.

To approximate the subglacial meltwater flux entering/leaving the largest lake we detected (Lake L1), we calculated the rate  
of volume change corresponding to ice surface uplift/deflation over time (Malczyk et al., 2020). We use Lake L1 as an example  
for estimating water flux, as it is located close to the [ice margin grounding line](#) where topographic uncertainty is relatively low,  
355 and has one of the smallest mean upstream catchment areas ( $0.9 \times 10^4 \text{ km}^2$ , Table 1). Average subglacial water flux was  $4.9$   
 $\text{m}^3 \text{ s}^{-1}$  between November 2003 and May 2023. For comparison, Malczyk et al. (2020) estimated an average water flux of  $141$   
 $\text{m}^3 \text{ s}^{-1}$  in 2013 for a network of active lakes upstream of Thwaites Glacier (Thw<sub>70</sub>, Thw<sub>124</sub>, Thw<sub>142</sub> and Thw<sub>170</sub>). Modelled  
upstream melt supplies to their lake network range from  $0.04$ - $0.17 \text{ km}^3 \text{ a}^{-1}$  ( $1.3$ - $5.4 \text{ m}^3 \text{ s}^{-1}$ ) although these lakes are considerably  
larger than those in our study (up to  $484 \text{ km}^2$ ; Smith et al., 2017). In our water flux estimations, we assume no lake outflow  
360 during lake filling, though it is possible a lake could increase in volume whilst discharging water downstream if a high lake  
influx exceeds lake outflow (Carter and Fricker, 2012). These assumptions mean that our estimated water flux is likely to be  
a minimum estimate.

### 3.3 ~~Subglacial water flow~~Predicted subglacial water routing

We simulated an ensemble of 50 equally-likely bed elevation grids using sequential Gaussian simulation ([Supplementary Fig.](#)  
365 [Y7: Simulations 1-3](#)). The resulting grids are consistent along survey profiles and have continuous, regionally representative  
roughness simulated between measurements. Throughout the ensemble, water routing analyses predict dendritic networks of  
subglacial streams routing water from inland towards the grounding line (Supplementary Fig. [S8](#)). This broad pattern of  
drainage remains consistent over the ensemble, but the kilometer-scale routing of meltwater varies. Stream probability maps  
(Fig. 1a) show water flow predictions strongly controlled by bed topography in the inland mountain regions where radar  
370 measurements are limited but nevertheless outcrop surface elevation data help constrain [the bed topography water routing](#).  
High stream probability coincides with dense radar survey coverage, for example surrounding the Nivlisen Ice Shelf, showing  
the impact of data density on reducing water routing uncertainty. Lower stream probability regions that resemble  
[diffuse discontinuous](#), spatially-distributed streams occur between higher-probability streams, for example inland of the Roi  
Baudouin Ice Shelf eastward of  $27^\circ \text{ E}$  (Fig. 6e) and inland of the Muninisen Ice Shelf, often coinciding with widely-spaced  
375 radar survey profiles. Other regions show inconsistent water routing despite regularly-spaced radar profiles, such as within  $50$   
 $\text{km}$  of the Vigridisen grounding line (Fig. 1a). This reflects an absence of strong topographic features that control the routing  
of water, [meaning so that](#) small differences in simulated [topography elevations](#) over the ensemble can reroute water and lead  
to inconsistent water routing and more diffuse stream predictions.

380 We compared our lake observations with the subglacial drainage patterns and found good spatial correspondence over some  
of the lakes. Predicted water routing shows direct drainage to the western Roi Baudouin Ice Shelf grounding line and identifies

likely subglacial outlet locations (Fig. 6a). Lake R1 aligns with several known subglacial water conduits detected [at the grounding line](#) in airborne ice-penetrating radar data that align with two sub-ice-shelf channels (Fig. 6a, Drews, 2015; Drews et al., 2017; 2020). This agreement indicates that Lake R1 is likely to be discharging subglacial meltwater [directly](#) into the ice-shelf cavity through a channelized subglacial conduit system and could contribute to a meltwater plume that forms the sub-ice-shelf channel. However, Lake R1 is 6 km from the closest radar survey profile, and our subglacial stream probabilities highlight that precise drainage routes are less certain here since topographic uncertainty is [high \(MAD > ~~over~~ 125 m\)](#) in the middle of adjacent radar survey profiles (Fig. 6a). Given the topographic uncertainty in this region, we cannot rule out the potential for lake drainage towards different outlets, for example if ephemeral subglacial channels close between drainage events. Several ice-shelf channels on Roi Baudouin aligned to ice flow direction correspond with the predicted subglacial meltwater outlets beneath the grounded ice sheet and align with the location of Lakes R2 and R3 (Fig. 6e). Therefore, Lakes R2 and R3 could discharge basal water that is routed towards multiple subglacial outlets at the Roi Baudouin grounding line.

Further west, the probability map of subglacial drainage catchments (Supplementary Fig. [64](#)) shows with high confidence that an extensive catchment of minimum 19,000 km<sup>2</sup> is draining towards Lake V1. Downstream water routing predictions vary too much at the kilometre-scale to conclusively determine ~~ice-margin~~ outlet locations [at the grounding line](#), and water routing shows drainage towards the grounding lines of either Vigridisen Ice Shelf or the neighbouring Fimbulisen Ice Shelf (Fig. 6b). Inland of Lazarevisen Ice Shelf, predicted subglacial stream and outlet locations become more uncertain, reflecting sparser radar profile spacing (up to 19 km), but suggest Lake L1 likely discharges meltwater to the Lazarevisen Ice Shelf grounding line (Fig. 6c). Our water routing analyses also predicts high-probability streams connecting Lakes M1 and M2, suggesting interconnected lakes which drain [directly](#) into the ice-shelf cavity (Fig. 6d). The predicted subglacial outlet here is close to several sub-ice-shelf channels, indicating Lakes M1 and M2 feed a persistent sub-shelf channel when they drain.

## 4 Discussion

### 4.1 Lake distributions [at-in the coastal region of the Antarctic ice-sheet margin](#)

We identify seven previously undocumented active subglacial lakes in coastal DML at six localities [in five different drainage basins and](#) within 5 km of the ice-sheet grounding line, feeding into separate ice shelves (Fig. 1a). The combination of ICESat, ICESat-2 and REMA observations presented here build upon large-scale repeat satellite altimetry studies of hydrologically active subglacial lakes elsewhere in Antarctica (e.g., Fricker et al., 2007, 2009; Smith et al., 2009; Siegfried and Fricker, 2021). Only ten active lakes have been identified previously within 50 km of the Antarctic-wide grounding line for the rest of Antarctica (Livingstone et al., 2022). These ten known lakes nearby the grounding line are found on the Antarctic Peninsula (1 lake), inland of Totten Glacier (2 lakes), and inland of the Rutford (1 lake), Mercer (2 lakes), Whillans (3 lakes) and Kamb ice streams (1 lake) (Scambos et al., 2011; Wright and Siegfried, 2012; Siegfried and Fricker, 2018).

The location of our identified subglacial lakes demonstrate that thicker, fast-flowing upstream ice is not a pre-requisite for active subglacial lake existence at least in this part of East Antarctica. All seven lakes are located below sea level and below ice thicknesses of 812-1524 m (Table 1; Fig. 1b). In contrast, the mean ice thickness ~~of over~~ previously reported active lakes in Antarctica is 2272 m (Livingstone et al., 2022). The newly detected lakes are generally located beneath slow-flowing ice (<65 m a<sup>-1</sup>) (Fig. 1b). This contrasts with most known active lakes within 100 km of the Antarctic grounding line that lie beneath fast-flowing ice (>200 m a<sup>-1</sup>; Gardner et al., 2018; Livingstone et al., 2022). Two exceptions are Lakes KT2 (31.7 km<sup>2</sup>) and KT3 (38.7 km<sup>2</sup>) beneath the Kamb Ice Stream, which are comparable in area to our Lakes L1 and R1 (31-38 km<sup>2</sup>) and are located under near-stagnant ice (<2 m a<sup>-1</sup>) (Kim et al., 2016; Siegfried and Fricker, 2018). Another exception is the active lake system beneath Haynes Glacier in West Antarctica, where ice flow speed is ~131 m a<sup>-1</sup> (Hoffman et al., 2020). Ice thickness above these ~~three-four~~ lakes (820 – 1845 m) is within a similar range to our lakes (828-1503 m, Table 1). Much of the grounded ice along the Antarctic ~~ice margin~~coast is slow-flowing (<200 m a<sup>-1</sup>) and lies below sea level within a similar ice thickness range. Consequently, moderately-sized ~~near margin~~ active subglacial lakes in the coastal region, similar to the ones presented here at 1-10 km in length and at least 20 – 40 km<sup>2</sup>, are likely under-represented in Antarctic-wide inventories, yet could store and release significant volumes of water. Large volumes of water stored and released by these subglacial lakes could regulate downstream ice flow (Siegfried et al., 2016) and control the location of subglacial ice margin water outlets ~~locations at the grounding line~~, driving sub-ice shelf circulation and melting that could impact ice-shelf stability (e.g. Jenkins et al., 2011, Gwyther et al., 2023).

That these lakes are located so close to the ~~ice margin~~ice-sheet grounding line beneath relatively slowly flowing ice is unexpected, since the ice-sheet bed is predicted to be cold beneath large parts of the Antarctic coastal region (Pattyn, 2010). since thick ice and low surface mass balance at inland regions of Antarctica are typically associated with thawing ice sheet bed where geothermal heat flow and ice flow speeds are low (Pattyn et al., 2016). In contrast, thawing ice-sheet bed is typically associated with low geothermal heat flow and ice flow speeds beneath thick ice and low surface mass balance at inland regions of Antarctica (Pattyn, 2010; Pattyn et al., 2016). However, the presence of these lakes in coastal DML indicates ~~that there~~ are ~~existence of~~ temperate basal conditions where meltwater is accumulating either in situ or is sourced from pressure changes upstream that trigger drainage further downstream along a channelized subglacial system (Hoffman et al., 2020; Neckel et al., 2021; Dow et al., 2022). The ensemble analyses of bed topographies indicate that the detected lakes have large potential upstream catchments, ranging from 0.5 x 10<sup>4</sup> km<sup>2</sup> (R1) to 2.3 x 10<sup>4</sup> km<sup>2</sup> (V1; Table 1). For lakes located beneath slow-flowing ice, upstream subglacial meltwater supply is primarily controlled by geothermal heat flow (Malczyk et al., 2020) and model results suggest grounded basal ice across DML is at the pressure melting point (Pattyn, 2010). Therefore, lake recharge is likely regulated by geothermal heat flow, not by frictional heat generated by fast-flowing ice streams or outlet glaciers. The spatial distribution of our lakes can be used to constrain estimates of geothermal heat flow by calculating the minimum geothermal heat flow needed to keep the ice-sheet base at pressure melting point at the lake locations (Wright ~~et al.~~ and Siegert, 2012). Given that our estimated lake recharge rate for Lake R1 is 0.03 km<sup>3</sup> a<sup>-1</sup> and the subglacial drainage catchment is 0.5

x10<sup>4</sup> km<sup>2</sup>, the mean basal melt rate required over the [basin-catchment](#) to fill Lake R1 can be approximated as 0.03 km<sup>3</sup> a<sup>-1</sup> / 0.5 x10<sup>4</sup> km<sup>2</sup> = 6 mm a<sup>-1</sup>. Similarly, for Lake L1 the required basal melt rate can be approximated as 2.2 mm a<sup>-1</sup>. This is within a reasonable range for coastal DML, where ice sheet model experiments have suggested that the mean basal melt rate can reach up to 10 mm a<sup>-1</sup> beneath grounded ice (Pattyn, 2010).

None of the newly [detected](#) lakes in this study are beneath ice experiencing extensive surface meltwater production or ponding (Arthur et al., 2022; Mahagaonkar ~~and Moholdt, 2022~~ et al., 2024), meaning surface meltwater reaching the ice bed can be discounted as a potential influence on subglacial lake recharge/behaviour. However, [we discounted](#) a ~1.8 km-wide surface elevation anomaly 5 km inland of the Nivlisen Ice Shelf grounding line ~~was discounted~~ as subglacial in origin because large volumes of supraglacial meltwater are known to pond and flow onto the ice shelf in this region (Dell et al., 2020; ~~Arthur et al., 2022~~). Extensive supraglacial lake activity can produce large local apparent elevation change that can be misclassified as subglacial lake activity, although it is possible for subglacial lake drainage to create an ice-surface depression that provides a natural basin for surface meltwater to pond (Fan et al., 2023). Additionally, perennial buried lake drainage close to the grounding line can also produce surface elevation change signatures on the order of several metres. Approximately 40 km west of Lake R1, Dunmire et al. (2020) detected an average ice surface lowering of ~2.5 m over 1 year and 8 months due to [draining of](#) a buried lake ~~draining~~, and Sentinel-1 data indicated that the lake drained again three years later. In contrast, our results show that ice surface uplift and lowering over the seven subglacial lakes occurs over multi-year timescales, with a longer cyclicity (~2-5 years).

One possible consideration for the two lakes closest to the grounding line (<16 km, M1 and M2) is that the observed elevation anomalies along these four ICESat-2 tracks reflect seawater intrusion ~~in from~~ the ice-shelf grounding zone. Tidal migrations of seawater intrusions up to 20 cm thick along subglacial troughs over timescales of several weeks have been reported from Sentinel-1 differential InSAR up to 15 km upstream of the Amery Ice Shelf grounding line (Chen et al., 2023). Robel et al. (2022) also showed with numerical modelling that seawater intrusion over impermeable beds may occur up to tens of kilometres upstream of grounding lines. However, ~~the~~ magnitude of observed elevation anomalies at M1 and M2 (>2 m ice surface uplift) and the multi-year timescale of these changes indicates lake filling rather than intrusion of a centimetre-scale seawater sheet. [The predicted presence of subglacial sedimentary basins in coastal DML suggests a permeable ice-sheet bed, meaning seawater intrusion is unlikely \(Li et al., 2022\).](#)

## 4.2 Lake filling and draining patterns

We show that the seven lakes fill and drain over periods of several years (Fig. 3, Fig. 5). This is consistent with observations from ICESat and ICESat-2 measurements elsewhere in Antarctica, where lakes [continuously](#) drain or fill over 3 or 4 years (e.g. Fricker and Scambos, 2009; Fricker et al., 2007; Smith et al., 2009). Similarly, Livingstone et al. (2022) reported lakes in



480 Antarctica exhibiting extended multi-year periods of ~~quiescence (filling)~~-filling and draining, based on the ratio of ~~filling~~-(ice surface uplift) and ~~draining~~-(ice surface subsidence) of ~~known previously identified~~ active lakes.

The limited spatial coverage, observational frequency and duration of ICESat, ICESat-2 and REMA make it challenging to determine the frequency of lake fill-drain cycles and to resolve potential rapid, episodic lake drainages on daily to monthly  
485 timescales. There might also be some undetected smaller lakes as ICESat-2 repeat track spacing is up to 9 km in coastal DML, while the smallest lakes we recorded were 5 km wide. Smaller, centimetre-scale surface expressions of lake activity or seawater intrusion on shorter timescales require more detailed or sensitive data like InSAR (Neckel et al., 2021). For example, Neckel et al. (2021) showed that eight lakes of comparable size (7-51 km<sup>2</sup>) inland of the [ice stream](#) Jutulstraumen ~~Glacier~~ drained in a cascade over 12 days to ~5 months. Consequently, the short-term dynamics and hydrological networks of the new lakes we  
490 report may be under sampled, as they could also form interconnected, cascading systems.

### 4.3 Subglacial water flow

The agreement between our subglacial lake locations, predicted subglacial drainage pathways and ice-shelf channels indicates that these lakes are actively discharging subglacial meltwater through a channelized subglacial conduit system in coastal DML, likely routing subglacial water ~~directly~~ into ice-shelf cavities. Previously, this link was made for active lakes beneath fast-  
495 flowing ice streams e.g. beneath the MacAyeal Ice Stream and Thwaites Glacier in West Antarctica (Fricker et al., 2010, Smith et al., 2017). Further work should compare simultaneous observations of ice surface height anomalies and ice velocity changes to constrain how the subglacial hydrological system co-evolves with subglacial lake fill-drain activity and to determine the influence on ice-shelf dynamics in coastal DML. Similar investigations have been conducted for a series of subglacial drainage events along the Northeast Greenland Ice Stream using Sentinel-1 DInSAR (Andersen et al., 2023) and Thwaites Glacier using  
500 Sentinel-1 and GNSS (Hoffman et al., 2020).

Our probability analysis of subglacial water routing shows increased uncertainty in drainage pathways downstream of Lakes V1, L1, R1 and R2 (Fig. 6c-f), mainly due to sparse radar survey coverage in these regions. Also, subglacial channels in these regions could ~~also~~ be ephemeral and only form during lake drainage events (Smith et al., 2017), ~~and~~ ~~W~~ without strong  
505 topographic drivers of water flow it is possible that the routing of meltwater and outlet locations could be variable between [drainage](#) events which could affect the location of subglacial meltwater outlets and consequently local sub-ice-shelf circulation and melt rates. Our analysis highlights regions where more densely-spaced radar profiles are needed to reduce uncertainty in basal topography and water routing, for example inland of the Roi Baudouin Ice Shelf and Lazarev Ice Shelf grounding lines. International coordinated programmes like RINGS (Matsuoka et al., 2022; [scar.org/science/cross/rings](http://scar.org/science/cross/rings)) involving new radar  
510 data collection along and inland of the Antarctic grounding line should help to close this knowledge gap.

## 5 Summary and Outlook

We identified seven local surface height anomalies of magnitudes up to  $\pm 4$  m using repeated ICESat-2 records in coastal DML, which we interpret as active subglacial lakes. The largest of these lakes was  $\sim 9$  km long and  $\sim 5$  km wide. ICESat laser altimetry and REMA strip differencing were used to extend the elevation change time series over three of these lakes. We detected multiple long-term lake fill-drain cycles from ICESat and ICESat-2 repeat tracks, which coincide spatially with elevation anomalies from differenced REMA strips. Six of the seven lakes coincide with predicted subglacial drainage systems using an ensemble of stochastically-simulated bed topographies that consider potential bed roughness between survey profiles. The combination of these datasets indicates that the hydrologically-active lakes fill and drain over several years and are linked to channelized subglacial drainage routing meltwater towards the grounding line ~~in coastal DML~~. In contrast to previously detected subglacial lakes that are typically located under fast-flowing or thicker inland ice, the newly detected lakes are found beneath slower-flowing ( $17\text{-}172 \text{ m a}^{-1}$ ) grounded ice near the ~~ice margin~~ grounding line, with implications for ice-sheet dynamics and freshwater discharge beneath ice shelves. Our results improve knowledge of subglacial meltwater dynamics in this region of East Antarctica and provide new observational data to refine subglacial hydrological models, for example for validating predicted lake and stream locations. ~~This~~ Such refinements are crucial to accurately capture the complexity of dynamic basal conditions and their impact on ice-sheet dynamics.

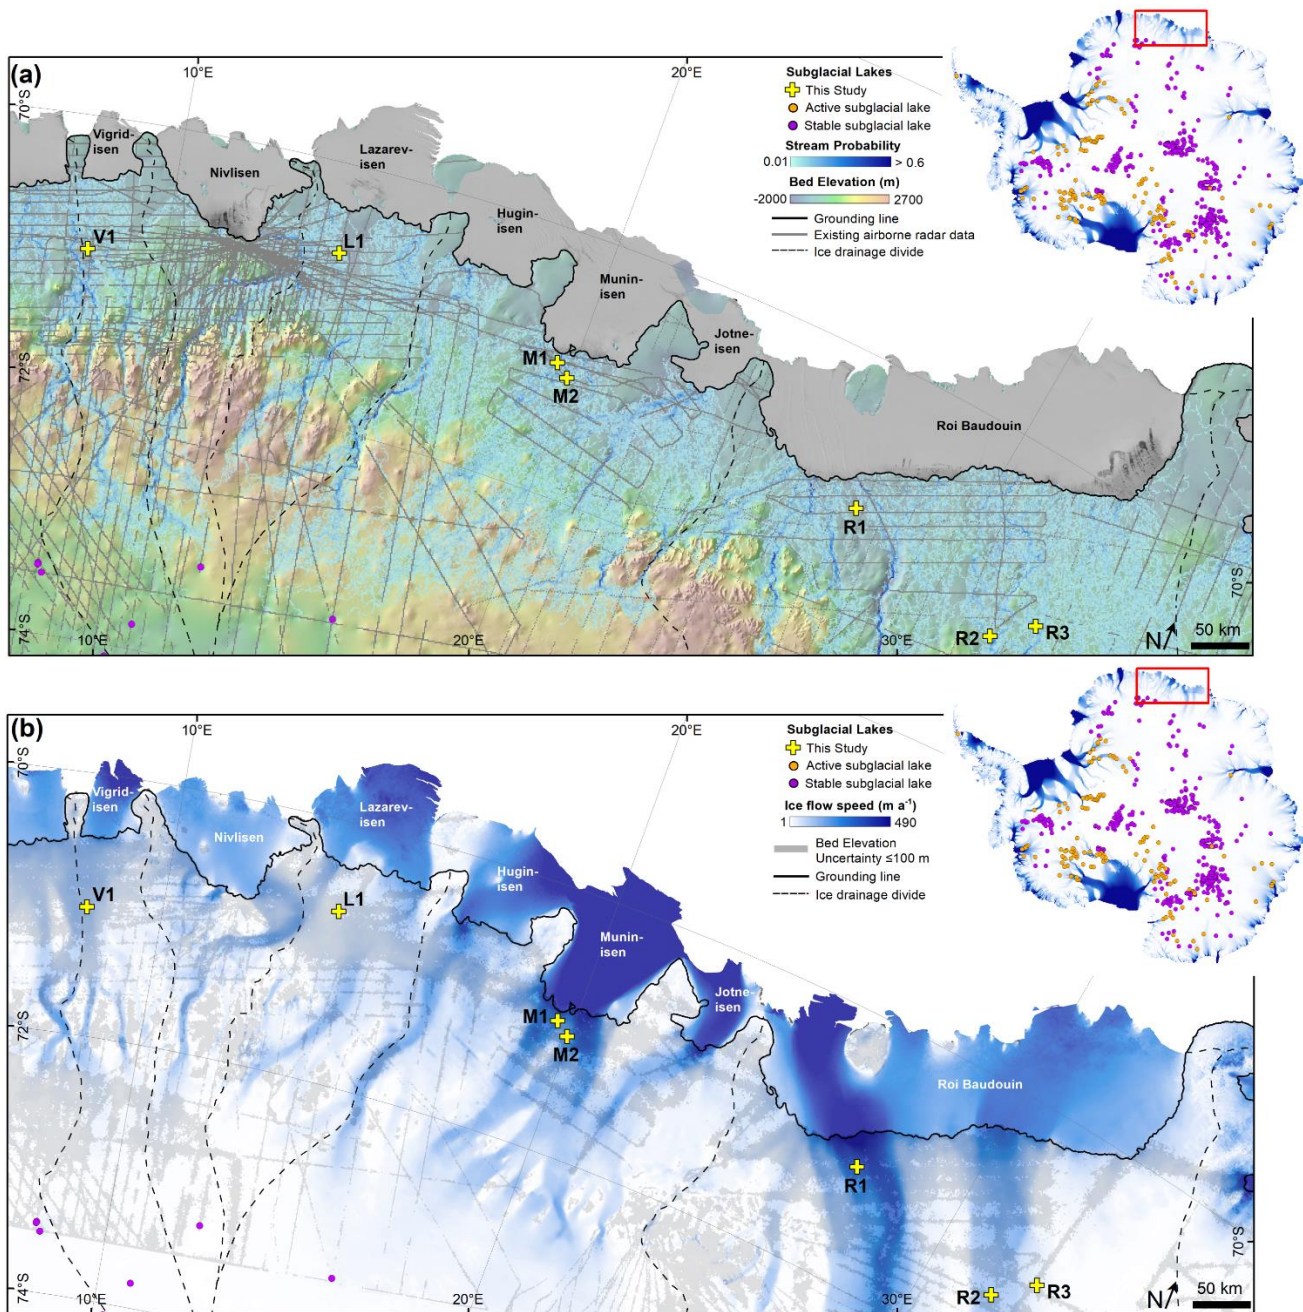

530 Figure 1: The coastal region in Dronning Maud Land. (a) The locations of active subglacial lakes identified in this study in relation  
 to predicted subglacial stream locations based on water routing analysis, bed topography and regional radar data availability. The  
 535 ~~blue~~ ~~solid~~ line is the MEaSUREs grounding line (Rignot et al., 2016), bed elevations are from BedMachine (Morlighem et  
 al., 2022), radar data availability is from Frémand et al. (2023), and the ice ~~flow~~ drainage divides (dashed lines) are from Mouginot  
 et al. (2017). Subglacial lake locations in the inset map are from Livingstone et al. (2022), where active lakes are represented by  
 orange dots and stable lakes by ~~green~~ ~~purple~~ dots. (b) Ice flow speed (Gardner et al., 2018) in blue shading and areas with bed  
 elevation uncertainty < 100 m based on the median absolute deviation between 50 bed topography simulations in this study (all other  
 regions > 100 m). Simulations of subglacial water drainage pathways are limited to ca. <73° south.



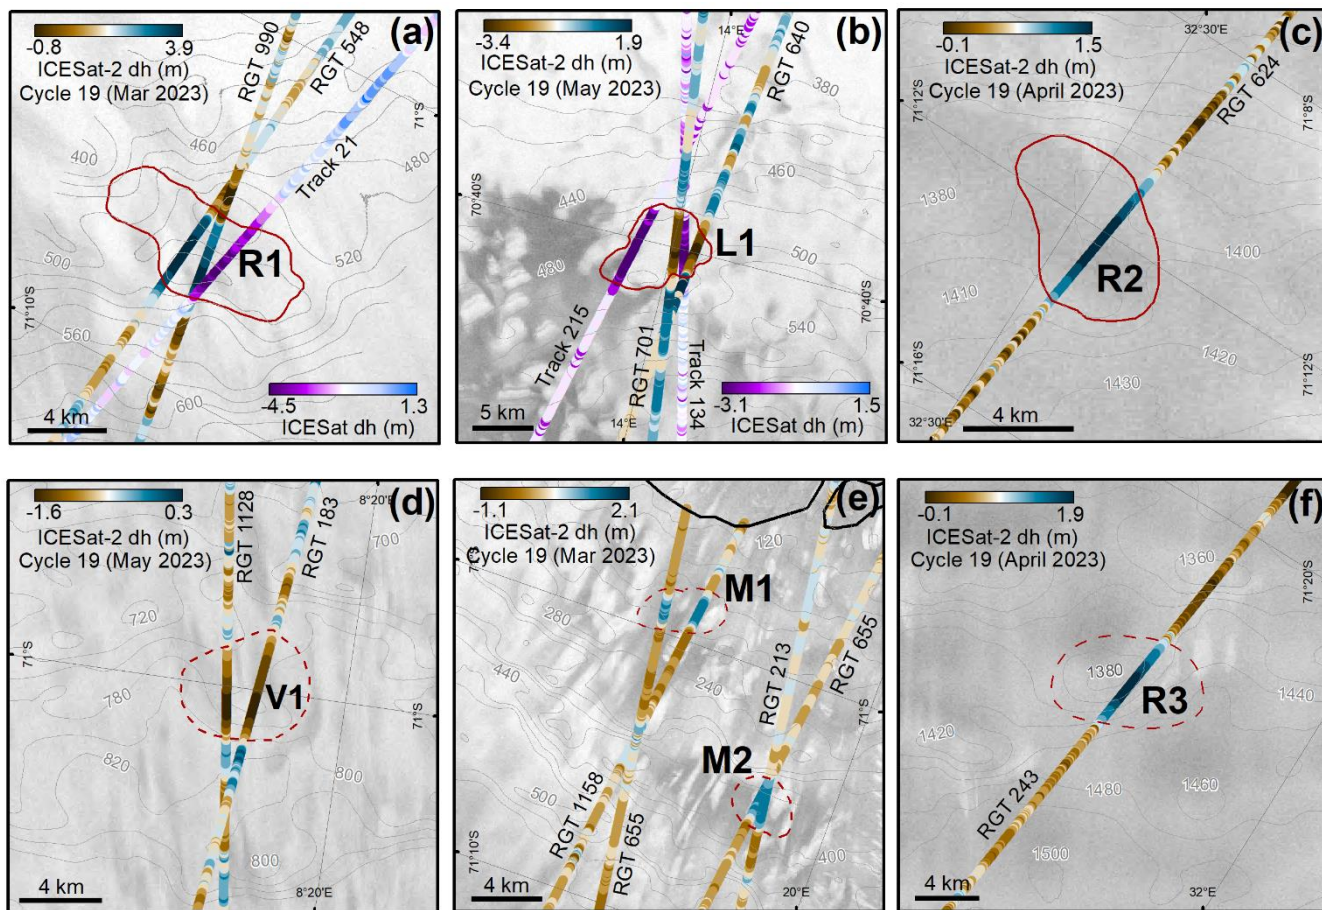

Figure 2: Along-track surface elevation anomalies for each detected subglacial lake, indicating ice surface subsidence (subglacial lake draining) or uplift (subglacial lake filling). ICESat-2 reference ground tracks (RGTs) shown in Panels a-f and ICESat tracks shown in Panels a and b. Inferred lake boundaries derived from REMA differencing (Panels a, b and c-) are shown as black dashed red solid lines, while manually delineated lake boundaries - or manual delineation (Panels d, e, f-) purple are shown as red dashed lines. Ice flow direction is represented by black arrows (Gardner et al., 2018). Contours represent surface elevation from REMA (Howat et al., 2019). The bold black line in Panel (e) is the MEaSUREs grounding line (Rignot et al., 2016). Other observed ice surface elevation changes do not meet the > 1 m anomaly criteria for active lakes (Section 2.53). Background image is the RADARSAT mosaic (Jezek et al., 2013).

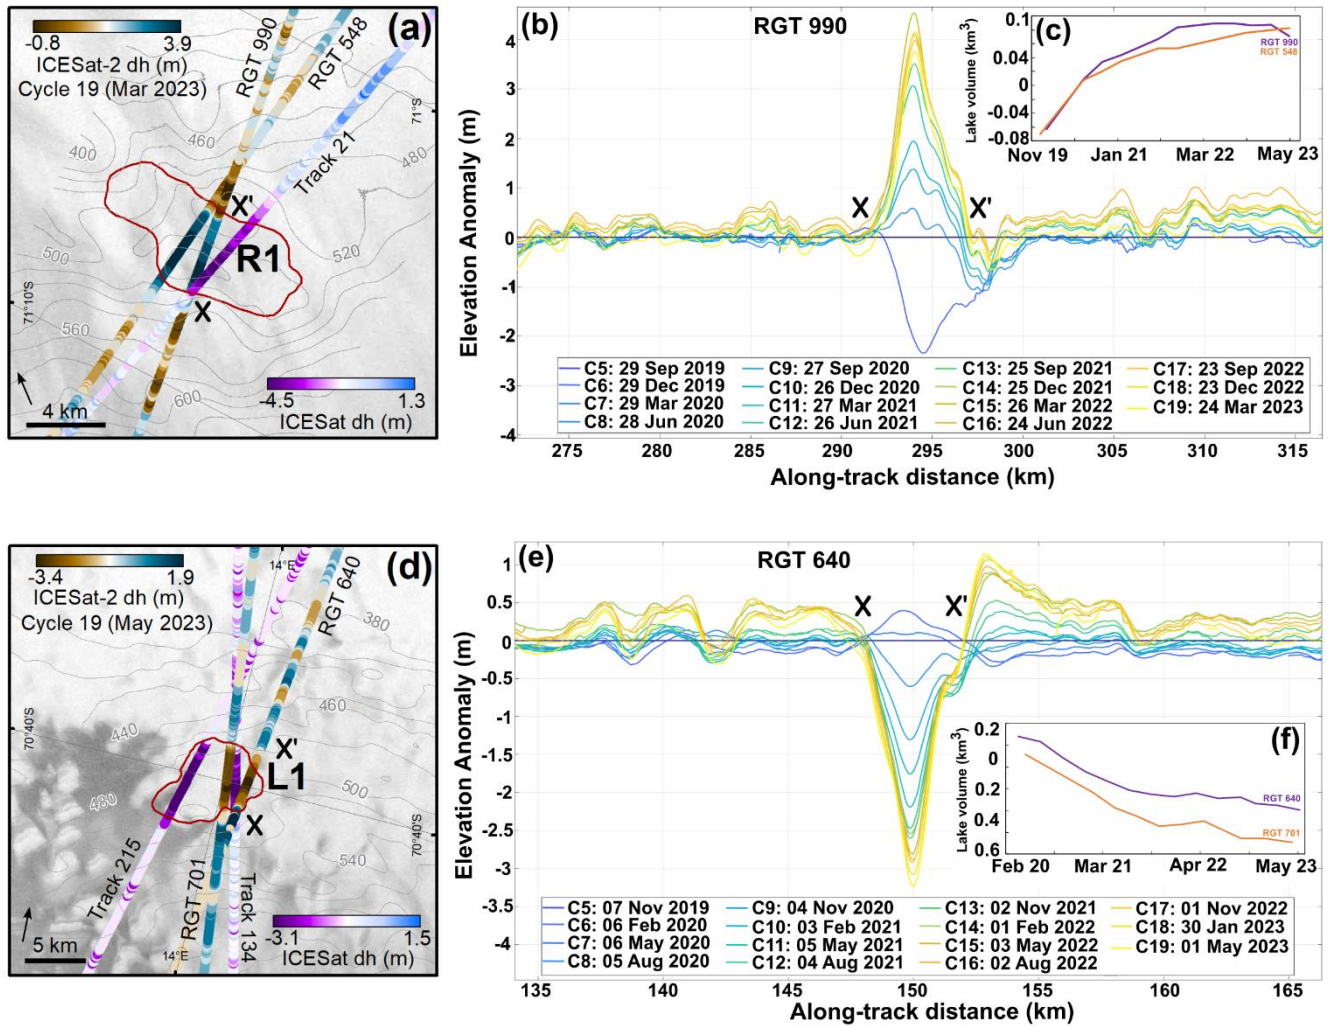

555 Figure 3: Ice surface elevation displacements for an actively filling lake (Lake R1, a-c) upstream of the Roi Baudouin Ice Shelf and an actively draining lake (Lake L1, c-e) upstream of the Lazarev Ice Shelf, both derived from ICESat-2 and ICESat. Significant (>1 m) ice surface elevation anomalies along ICESat-2 reference ground tracks (RGTs) are highlighted by X-X' in each panel. Panels (b) and (e) show ice surface elevation displacements relative to ICESat-2 Cycle 3 (April/May 2019). Ice surface elevations from Cycle 4 are not plotted as these were removed by the data quality flag during initial data filtering. Colours correspond to each individual ICESat-2 cycle. Panels (c) and (f) show time series of estimated lake volume.



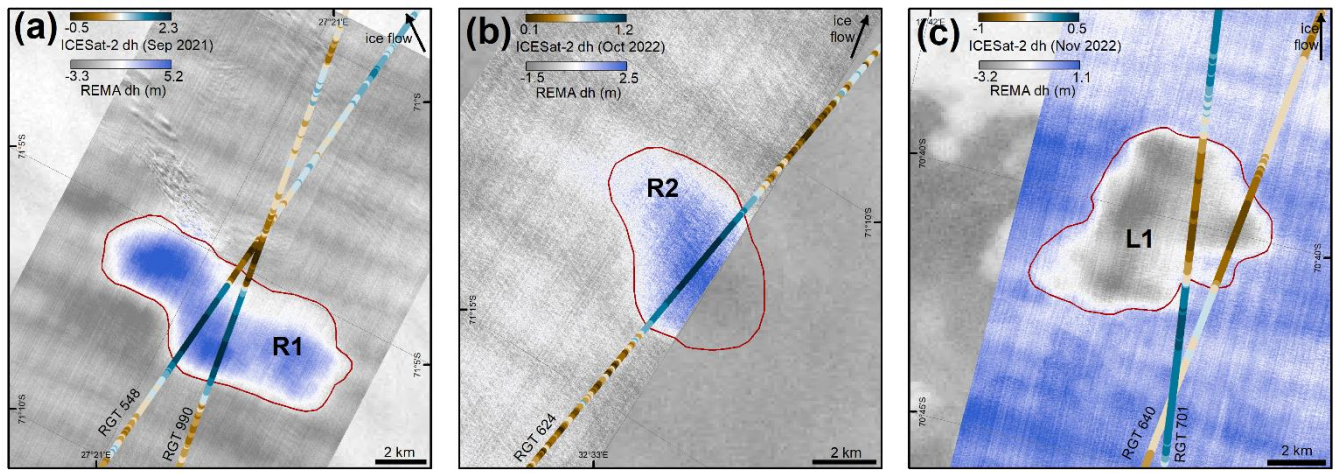

565 **Figure 4: Ice surface elevation change from REMA strip differencing. (a) Lake R1, and (b) Lake R2, both upstream of the Roi**  
**Baudouin Ice Shelf. (c) Lake L1 upstream of the Lazarev Ice Shelf. ICESat-2 elevation changes are relative to April 2019 (a) and**  
**May 2019 (b, c). Regions of localised elevation anomaly (blue shading for uplift and yellow shading for subsidence) between REMA**  
**strip pairs (22<sup>nd</sup> October 2019 – 10<sup>th</sup> January 2021 in Panel a, 18<sup>th</sup> January 2021 – 28<sup>th</sup> December 2022 in Panel b, 25<sup>th</sup> January 2020**  
**– 15<sup>th</sup> February 2021 in Panel c) are delineated by the dashed-red lines. These boundaries were outlined manually based on visual**  
**assessment. Each example highlights the spatial co-occurrence between significant localised ice surface uplift/subsidence and surface**  
**elevation anomalies along the intersecting ICESat-2 reference ground tracks (RGTs). The slight offset between the localised elevation**  
**anomalies in the ICESat-2 RGTs tracks and the REMA difference map over Lake R1 in Panel (a) could be due to lake boundary**  
**migration since the date of the REMA strip (January 2021).**



575

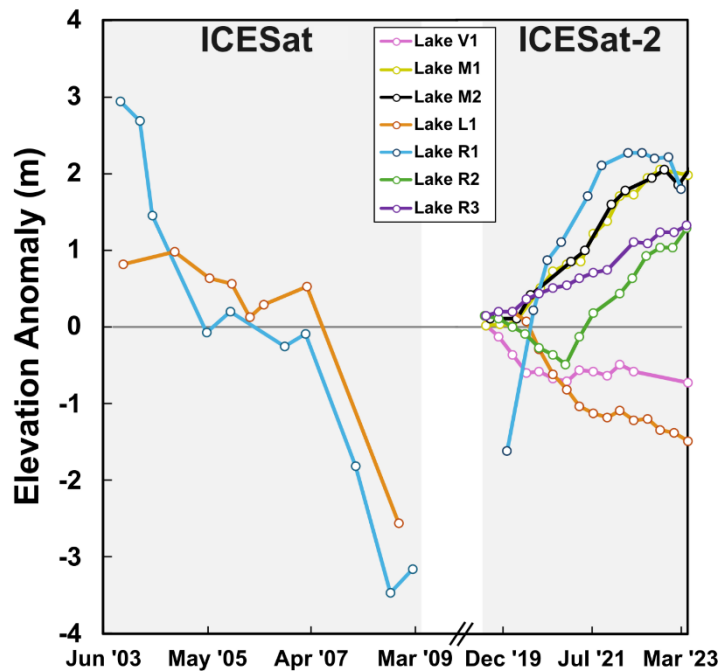

580

590 Figure 5: ICESat and ICESat-2-derived ice surface elevation time series (calculated as median elevation anomalies within each lake boundary with respect to elevations in the first available cycle). Lakes L1, R1 and R2 use lake boundaries derived from REMA differencing and Lakes V1, M1, M2 and R3 use boundaries based on locations of significant (>1 m) elevation anomalies over a distance of a kilometre or more.

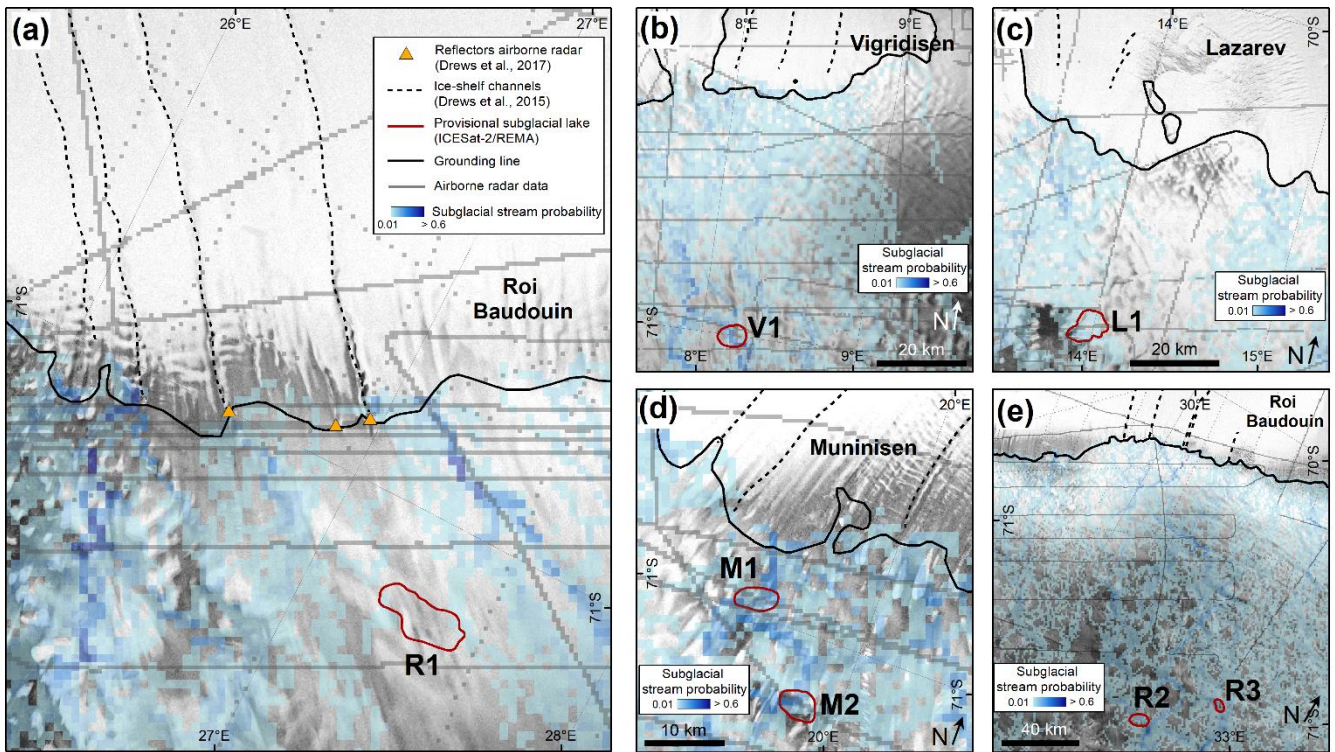

595 **Figure 6:** Simulated subglacial water routing and mapped ice-shelf channels in the vicinity of identified active lake areas in this  
 600 study (red red outlines). Ice-shelf channels (black dashed lines) are from Drews (2015) (a-b) and manually delineated from REMA  
 and RADARSAT imagery in this study (c-e). The yellow-black solid line is the MEaSUREs grounding line (Rignot et al., 2016), the  
 purple-grey lines are radar data locations from Frémand et al. (2023), and the orange triangles are reflectors in airborne radar data  
 interpreted as subglacial water flow outlets (Drews et al., 2017). The background image is the RADARSAT mosaic (Jezek et al.,  
 2013).

**Table 1: Subglacial lakes identified in this study. Lake areas are listed for those lakes where elevation anomalies were also derived from REMA strip differencing. Ice flow speed (Gardner et al., 2018), ice thickness (Fretwell et al., 2013; Morlighem et al., 2022) and bed elevation (Morlighem et al., 2022) are mean values within each inferred lake boundary. Bed elevation uncertainty is the median absolute deviation of 50 stochastic bed elevation simulations. Potential upstream catchment areas are ensemble-mean values from derived from water routing analyses using simulated bed. the same topographic simulations.**

| Lake Name | Location/Distance from Grounding Line | Centre Lon, Lat (decimal degrees) | Area (km <sup>2</sup> ) | Ice flow speed (m a <sup>-1</sup> ) | Bedmap2 ice thickness (m) | BedMachin e ice thickness (m) | Upstream catchment area (km <sup>2</sup> ) | Bed elevation (m above sea level) | Bed elevation uncertainty (m) |
|-----------|---------------------------------------|-----------------------------------|-------------------------|-------------------------------------|---------------------------|-------------------------------|--------------------------------------------|-----------------------------------|-------------------------------|
| V1        | Vigrdisen<br>(54 km)                  | 8.19E, 70.99S                     | Unconfirmed             | 60                                  | 1247                      | 1321                          | 2.3 x 10 <sup>4</sup>                      | -552                              | 58                            |
| L1        | Lazarev (32 km)                       | 13.97E, 70.67S                    | 40.1                    | 19                                  | 1020                      | 1019                          | 0.9 x 10 <sup>4</sup>                      | -558                              | 47                            |
| M1        | Muninisen<br>(5 km)                   | 19.60E, 70.98S                    | Unconfirmed             | 152                                 | 828                       | 881                           | 0.8 x10 <sup>4</sup>                       | -724                              | 28                            |
| M2        | Muninisen<br>(15 km)                  | 19.87E, 71.07S                    | Unconfirmed             | 86                                  | 1008                      | 924                           | 1.2 x10 <sup>4</sup>                       | -633                              | 49                            |
| R1        | Roi Baudouin<br>(19 km)               | 27.41E, 71.10S                    | 39.4                    | 172                                 | 1137                      | 1193                          | 0.5 x10 <sup>4</sup>                       | -737                              | 76                            |
| R2        | Roi Baudouin<br>(115 km)              | 32.53E, 71.19S                    | 21.5                    | 17                                  | 1283                      | 1391                          | 1.4 x10 <sup>4</sup>                       | -29                               | 86                            |
| R3        | Roi Baudouin<br>(136 km)              | 31.65E, 71.44S                    | Unconfirmed             | 64                                  | 1503                      | 1547                          | 1.3x10 <sup>4</sup>                        | -162                              | 97                            |

## 615 Data Availability

ICESat-2 ATL11 Level 3B version 6 land ice height data are freely available from <https://nsidc.org/data/atl11/versions/6>. ICESat GLA12 version 34 land ice height data are freely available from <https://nsidc.org/data/glah12/versions/34>. Ice surface velocities from ITS-LIVE (Gardner et al., 2019, 2018) are available at <https://its-live.jpl.nasa.gov/#data-portal>. The REMA ice surface DEM strips (Howat et al., 2019) are available from the U.S. Polar Geospatial Center at <https://www.pgc.umn.edu/data/rema/>. The delineated lake boundaries are available as a shapefile from the Norwegian Polar Data Centre via <https://doi.org/10.21334/npolar.2024.ab777130> and the predicted subglacial stream locations produced by our water routing analysis are available as a GeoTIFF from the Norwegian Polar Data Centre via <https://doi.org/10.21334/npolar.2024.b438191c>. ~~<https://data.npolar.no/dataset/10.21334/npolar.2024.b438191c>~~

## Code Availability

625 Code used to process and plot ICESat-2 ATL11 Level 3B version 6 land ice height data and ICESat GLAH12 version 34 land ice height data are available at <https://zenodo.org/records/13640820>. The code and workflow for simulating the bed elevation grid ensemble and subglacial water flow routing is archived at: <https://zenodo.org/records/13627356>.

## Author Contributions

630 JA analysed the ICESat-2 and REMA data, performed the identification of active lakes, analysed the results and wrote the paper with input from all co-authors. CS and KM carried out stochastic bed topography simulations and the subglacial water flow routing analysis. GM contributed to the conception of the study and processed the ICESat data. All authors contributed to the discussion of the results and to editing of the manuscript.

## Competing Interests

The contact author has declared that none of the authors have any competing interests.

## 635 Acknowledgements

JA and CS are funded by the Research Council of Norway's FRINATEK project (project number: 315246). JA is also funded by a national infrastructure grant from the Norwegian Space Agency to the Norwegian Polar Institute (contract number: 74CO2303). The bed elevation simulations were performed on resources provided by Sigma2 - the National Infrastructure for High-Performance Computing and Data Storage in Norway through project NN10061K.

## 640 References

- Andersen, J.K., Rathmann, N., Hvidberg, C.S., Grinsted, A., Kusk, A., Merryman Boncori, J.P. and Mouginot, J.: Episodic subglacial drainage cascades below the Northeast Greenland Ice Stream. *Geophys. Res. Lett.*, 50(12), <https://doi.org/10.1029/2023GL103240>, 2023.
- 645 Arthur, J.F., Stokes, C.R., Jamieson, S.S., Rachel Carr, J., Leeson, A.A. and Verjans, V.: Large interannual variability in supraglacial lakes around East Antarctica. *Nat. Commun.*, 13(1), 1711, <https://doi.org/10.1038/s41467-022-29385-3>, 2022.
- Boening, C., Lebsack, M., Landerer, F. and Stephens, G.: Snowfall-driven mass change on the East Antarctic Ice Sheet. *Geophys. Res. Lett.*, 39(21), <https://doi.org/10.1029/2012GL053316>, 2012.
- Brenner, A.C., DiMarzio, J.P. and Zwally, H.J.: Precision and accuracy of satellite radar and laser altimeter data over the continental ice sheets. *IEEE Trans. Geosci. Remote Sens.*, 45(2), 321-331, <https://doi.org/10.1109/TGRS.2006.887172> 2007.
- 650

- Brunt, K.M., Smith, B.E., Sutterley, T.C., Kurtz, N.T., Neumann, T.A.: Comparisons of Satellite and Airborne Altimetry With Ground-Based Data From the Interior of the Antarctic Ice Sheet. *Geophys. Res. Lett.*, 48(2), e2020GL090572, <https://doi.org/10.1029/2020GL090572>, 2021.
- 655 Carter, S.P. and Fricker, H.A.: The supply of subglacial meltwater to the grounding line of the Siple Coast, West Antarctica. ~~*Ann. Glaciol.*~~, *Ann. Glaciol.*, 53(60), 267-280, <https://doi.org/10.3189/2012AoG60A119>, 2012.
- Carter, S.P., Fricker, H.A., Blankenship, D.D., Johnson, J.V., Lipscomb, W.H., Price, S.F. and Young, D.A.: Modeling 5 years of subglacial lake activity in the MacAyeal Ice Stream (Antarctica) catchment through assimilation of ICESat laser altimetry. *J. Glaciol.*, 57(206), 1098-1112, <https://doi.org/10.3189/002214311798843421>, 2011.
- 660 Chartrand, A.M. and Howat, I.M.: Basal channel evolution on the Getz Ice Shelf, West Antarctica. *J. Geophys. Res.*, 125(9), <https://doi.org/10.1029/2019JF005293>, 2020.
- Chen, H., Rignot, E., Scheuchl, B. and Ehrenfeucht, S.: Grounding zone of Amery Ice Shelf, Antarctica, from differential synthetic-aperture radar interferometry. *Geophys. Res. Lett.*, 50(6), <https://doi.org/10.1029/2022GL102430>, 2023.
- Dell, R., Arnold, N., Willis, I., Banwell, A., Williamson, A., Pritchard, H. and Orr, A.: Lateral meltwater transfer across an Antarctic ice shelf. *The Cryosphere*, 14(7), 2313-2330, <https://doi.org/10.5194/tc-14-2313-2020>, 2020.
- 665 Dow, C.F., Ross, N., Jeofry, H., Siu, K. and Siegert, M.J.: Antarctic basal environment shaped by high-pressure flow through a subglacial river system. *Nat. Geosci.*, 15(11), 892-898, <https://doi.org/10.1038/s41561-022-01059-1>, 2022.
- Drews, R.: Evolution of ice-shelf channels in Antarctic ice shelves. *The Cryosphere*, 9, 1169–1181, <https://doi.org/10.5194/tc-9-1169-2015>, 2015.
- 670 Drews, R., Pattyn, F., Hewitt, I.J., Ng, F.S.L., Berger, S., Matsuoka, K., Helm, V., Bergeot, N., Favier, L. and Neckel, N.: Actively evolving subglacial conduits and eskers initiate ice shelf channels at an Antarctic grounding line. *Nat. Commun.*, 8(1), 15228, <https://doi.org/10.1038/ncomms15228>, 2017.
- Drews, R., Schannwell, C., Ehlers, T.A., Gladstone, R., Pattyn, F. and Matsuoka, K.: Atmospheric and oceanographic signatures in the ice shelf channel morphology of Roi Baudouin Ice Shelf, East Antarctica, inferred from radar data. *J. Geophys. Res.*, 125(7), <https://doi.org/10.1029/2020JF005587>, 2020.
- 675 Dunmire, D., Lenaerts, J.T.M., Banwell, A.F., Wever, N., Shragge, J., Lhermitte, S., Drews, R., Pattyn, F., Hansen, J.S.S., Willis, I.C. and Miller, J.: Observations of buried lake drainage on the Antarctic Ice Sheet. *Geophys. Res. Lett.*, 47(15), <https://doi.org/10.1029/2020GL087970>, 2020.
- ~~[ESA.: Sentinel-1: ESA's Radar Observatory Mission for GMES Operational Services. ESA SP 1322/1, ISBN 978-92-9221-418-0, 2012.](#)~~
- 680 ~~[ESA.: Sentinel-1: ESA's Radar Observatory Mission for GMES Operational Services. ESA SP 1322/1, ISBN 978-92-9221-418-0, 2012.](#)~~
- Fan, Y.; Hao, W.; Zhang, B.; Ma, C.; Gao, S.; Shen, X.; Li, F.: Monitoring the Hydrological Activities of Antarctic Subglacial Lakes Using CryoSat-2 and ICESat-2 Altimetry Data. *Remote Sens.* 14, 898, <https://doi.org/10.3390/rs14040898>, 2022.
- 685 Fan, Y., Ke, C.Q., Shen, X., Xiao, Y., Livingstone, S.J. and Sole, A.J.: Subglacial lake activity beneath the ablation zone of the Greenland Ice Sheet. *The Cryosphere*, 17(4), 1775-1786, <https://doi.org/10.5194/tc-17-1775-2023>, 2023.

- Flament, T., Berthier, E. and Rémy, F.: Cascading water underneath Wilkes Land, East Antarctic ice sheet, observed using altimetry and digital elevation models. *The Cryosphere*, 8(2), 673-687, <https://doi.org/10.5194/tc-8-673-2014>, 2014.
- Frémand, A.C., Fretwell, P., Bodart, J.A., Pritchard, H.D., Aitken, A., Bamber, J.L., Bell, R., Bianchi, C., Bingham, R.G., Blankenship, D.D. and Casassa, G.: Antarctic Bedmap data: Findable, Accessible, Interoperable, and Reusable (FAIR) sharing of 60 years of ice bed, surface, and thickness data. *Earth Syst. Sci. Data*, 15(7), <https://doi.org/10.5194/essd-15-2695-2023>, 2023.
- 690 [Fricker, H.A. and Padman, L.: Ice shelf grounding zone structure from ICESat laser altimetry. \*Geophys. Res. Lett.\*, 33\(15\), <https://doi.org/10.1029/2006GL026907>, 2006.](https://doi.org/10.1029/2006GL026907)
- Fricker, H.A., Scambos, T., Bindschadler, R., and Padman, L.: An Active Subglacial Water System in West Antarctica Mapped from Space. *Science*, 315(5818): 1544-1548, <https://doi.org/10.1126/science.1136897>, 2007.
- 695 Fricker, H.A. and Scambos, T.: Connected subglacial lake activity on lower Mercer and Whillans ice streams, West Antarctica, 2003–2008. *J. Glaciol.*, 55(190), 303-315, <https://doi.org/10.3189/002214309788608813>, 2009.
- Fricker, H.A., Scambos, T., Carter, S., Davis, C., Haran, T. and Joughin, I.: Synthesizing multiple remote-sensing techniques for subglacial hydrologic mapping: application to a lake system beneath MacAyeal Ice Stream, West Antarctica. *J. Glaciol.*, 56(196), 187-199, <https://doi.org/10.3189/002214310791968557>, 2010.
- 700 Fricker HA, Carter SP, Bell RE, Scambos T.: Active lakes of Recovery Ice Stream, East Antarctica: a bedrock-controlled subglacial hydrological system. *J. Glaciol.*, 60(223), 1015-1030, <https://doi.org/10.3189/2014JoG14J063>, 2014.
- Gardner, A. S., G. Moholdt, T. Scambos, M. Fahnestock, S. Ligtenberg, M. van den Broeke, and J. Nilsson: Increased West Antarctic and unchanged East Antarctic ice discharge over the last 7 years, *The Cryosphere*, 12(2): 521–547, <https://doi.org/10.5194/tc-12-521-2018>, 2018.
- 705 [Goel, V., Martín, C., Matsuoka, K.: Evolution of ice rises in the Fimbul Ice Shelf, Dronning Maud Land, over the last millennium. \*Ant. Sci.\*, 36\(2\), 2024, <https://doi.org/10.1017/S0954102023000330>.](https://doi.org/10.1017/S0954102023000330)
- Goeller, S., Steinhage, D., Thoma, M. and Grosfeld, K.: Assessing the subglacial lake coverage of Antarctica. *Ann. Glaciol.*, 57(72), 109-117, <https://doi.org/10.1017/aog.2016.23>, 2016.
- 710 Goldberg, D., Twelves, A., Holland, P., Wearing, M.G.: The Non-Local Impacts of Antarctic Subglacial Runoff. *JGR Oceans* 128(10) <https://doi.org/10.1029/2023JC019823>, 2023.
- [Gong, F., Zhang, K. and Liu, S.: Retrieving the grounding lines of the Riiser-Larsen Ice Shelf using Sentinel-1 SAR images. \*Int. J. Digit. Earth\*, 16\(1\), 2467-2486, <https://doi.org/10.1080/17538947.2023.2229785>, 2023.](https://doi.org/10.1080/17538947.2023.2229785)
- Gray, L., Joughin, I., Tulaczyk, S., Spikes, V.B., Bindschadler, R. and Jezek, K.: Evidence for subglacial water transport in the West Antarctic Ice Sheet through three-dimensional satellite radar interferometry. *Geophys. Res. Lett.*, 32(3), <https://doi.org/10.1029/2004GL021387>, 2005.
- 715 Gwyther, D.E., Dow, C.F., Jendersie, S., Gourmelen, N. and Galton-Fenzi, B.K.: Subglacial freshwater drainage increases simulated basal melt of the Totten Ice Shelf. *Geophys. Res. Lett.*, 50(12), <https://doi.org/10.1029/2023GL103765>, 2023.



- 720 [Hayden, A., & Dow, C.: Examining the effect of ice dynamic changes on subglacial hydrology through modelling of a synthetic Antarctic glacier. \*J. Glaciol.\*, 1-14. <https://doi.org/10.1017/jog.2023.65>, 2023.](#)
- Hodgson, D.A., Jordan, T.A., Ross, N., Riley, T.R. and Fretwell, P.T.: Drainage and refill of an Antarctic Peninsula subglacial lake reveal an active subglacial hydrological network. *The Cryosphere*, 16(12), 4797-4809, <https://doi.org/10.5194/tc-16-4797-2022>, 2022.
- 725 [Hoffman, A.O., Christianson, K., Shapero, D., Smith, B.E. and Joughin, I.: Brief communication: Heterogenous thinning and subglacial lake activity on Thwaites Glacier, West Antarctica. \*The Cryosphere\*, 14\(12\), 4603-4609. <https://doi.org/10.5194/tc-14-4603-2020>. 2020.](#)
- [Hogg, A., Shepherd, A., Gourmelen, N., & Engdhal, M.: Grounding line migration from 1992 to 2011 on Petermann Glacier, North West Greenland. \*J. Glaciol.\*, 62\(236\), 1104-1114, <https://doi.org/10.1017/jog.2016.83>, 2016.](#)
- 730 Howat, I.M., Porter, C., Smith, B.E., Noh, M.J. and Morin, P.: The reference elevation model of Antarctica. *The Cryosphere*, 13(2), 665-674, <https://doi.org/10.5194/tc-13-665-2019>, 2019.
- Humbert, A., Steinhage, D., Helm, V., Beyler, S. and Kleiner, T.: Missing evidence of widespread subglacial lakes at Recovery Glacier, Antarctica. *J. Geophys. Res.*, 123(11), 2802-2826, <https://doi.org/10.1029/2017JF004591>, 2018.
- Jenkins, A.: Convection-driven melting near the grounding lines of ice shelves and tidewater glaciers. *JPO*, 41(12), 2279-2294, <https://doi.org/10.1175/JPO-D-11-03.1>, 2011.
- 735 [Jezek, K. C., Curlander, J. C., Carsey, F., Wales, C., and Barry, R.G.: RAMP AMM-1 SAR Image Mosaic of Antarctica, Version2. Boulder, Colorado USA, NSIDC: National Snow and Ice Data Center, <https://doi.org/10.5067/8AF4ZRPULS4H>, 2013.](#)
- Kim, B.H., Lee, C.K., Seo, K.W., Lee, W.S. and Scambos, T.: Active subglacial lakes and channelized water flow beneath the Kamb Ice Stream. *The Cryosphere*, 10(6), 2971-2980, <https://doi.org/10.5194/tc-10-2971-2016>, 2016.
- 740 Kohler, J., Neumann, T.A., Robbins, J.W., Tronstad, S. and Melland, G.: ICESat elevations in Antarctica along the 2007–09 Norway–USA traverse: Validation with ground-based GPS. *IEEE GRSL*, 51(3), 1578-1587, <https://doi.org/10.1109/TGRS.2012.2207963>, 2012.
- [Le Brocq, A.M., Ross, N., Griggs, J.A., Bingham, R.G., Corr, H.F., Ferraccioli, F., Jenkins, A., Jordan, T.A., Payne, A.J., Rippin, D.M. and Siegert, M.J.: Evidence from ice shelves for channelized meltwater flow beneath the Antarctic Ice Sheet. \*Nat. Geosci.\*, 6\(11\), 945-948, <https://doi.org/10.1038/ngeo1977>, 2013.](#)
- 745 Lepp, A.P., Simkins, L.M., Anderson, J.B., Clark, R.W., Wellner, J.S., Hillenbrand, C.D., Smith, J.A., Lehrmann, A.A., Totten, R., Larter, R.D. and Hogan, K.A.: Sedimentary signatures of persistent subglacial meltwater drainage from Thwaites Glacier, Antarctica. *Front. Earth Sci.*, 10, <https://doi.org/10.3389/feart.2022.863200>, 2022.
- 750 [Liang, D., Guo, H., Zhang, L., Li, H. and Wang, X.: Sentinel 1 EW mode dataset for Antarctica from 2014–2020 produced by the CASEarth Cloud Service Platform. \*Big Earth Data\*, 6\(4\), 385-400, <https://doi.org/10.1080/20964471.2021.1976706>, 2022.](#) [Li, Y., Lu, Y. and Siegert, M.J.: Radar sounding confirms a](#)

- [hydrologically active deep-water subglacial lake in East Antarctica. \*Front. Earth Sci.\*, 8, https://doi.org/10.3389/feart.2020.00294, 2020.](https://doi.org/10.3389/feart.2020.00294)
- 755 [Li, L., Aitken, A.R., Lindsay, M.D. and Kulesa, B.: Sedimentary basins reduce stability of Antarctic ice streams through groundwater feedbacks. \*Nature Geoscience\*, 15\(8\), 645–650, https://doi.org/10.1038/s41561-022-00992-5, 2022.](https://doi.org/10.1038/s41561-022-00992-5)
- Livingstone, S.J., Li, Y., Rutishauser, A., Sanderson, R.J., Winter, K., Mikucki, J.A., Björnsson, H., Bowling, J.S., Chu, W., Dow, C.F. and Fricker, H.A.: Subglacial lakes and their changing role in a warming climate. *Nat. Rev. Earth Environ.*, 3(2), 106–124, <https://doi.org/10.1038/s43017-021-00246-9>, 2022.
- 760 [MacKie, E.J., Schroeder, D.M., Caers, J., Siegfried, M.R. and Scheidt, C.: Antarctic topographic realizations and geostatistical modeling used to map subglacial lakes. \*J. Geophys. Res. Earth Surf.\*, 125\(3\), https://doi.org/10.1029/2019JF005420, 2020.](https://doi.org/10.1029/2019JF005420)
- [MacKie, E.J., Schroeder, D.M., Zuo, C., Yin, Z. and Caers, J.: Stochastic modeling of subglacial topography exposes uncertainty in water routing at Jakobshavn Glacier. \*J. Glaciol.\*, 67\(261\), https://doi.org/10.1017/jog.2020.84, 2021.](https://doi.org/10.1017/jog.2020.84)
- 765 MacKie, E. J., Field, M., Wang, L., Yin, Z., Schoedl, N., Hibbs, M., & Zhang, A.: GStatSim V1.0: A Python package for geostatistical interpolation and conditional simulation. *GMD*, 16(13), 3765–3783, <https://doi.org/10.5194/gmd-16-3765-2023>, 2023.
- [Mahagaonkar A., Moholdt G., Glaude Q., Schuler T.V.: Supraglacial lake evolution and its drivers in Dronning Maud Land, East Antarctica. \*J. Glaciol.\*, 1-15. https://doi.org/10.1017/jog.2024.66, 2024.](https://doi.org/10.1017/jog.2024.66) [Mahagaonkar, A., Moholdt, G.: Surface meltwater lake extents and depths for 5 ice shelves of DML, East Antarctica, 2014–2021 \[Data set\]. \*Norwegian Polar Institute\*. https://doi.org/10.21334/npolar.2023.31aae21f, 2022.](https://doi.org/10.21334/npolar.2023.31aae21f)
- 770
- Malczyk, G., Gourmelen, N., Goldberg, D., Wuite, J. and Nagler, T.: Repeat subglacial lake drainage and filling beneath Thwaites Glacier. *Geophys. Res. Lett.*, 47(23), <https://doi.org/10.1029/2020GL089658>, 2020.
- Malczyk G, Gourmelen N, Werder M, Wearing M, Goldberg D.: Constraints on subglacial melt fluxes from observations of active subglacial lake recharge. *J. Glaciol.*, 1-15, <https://doi.org/10.1017/jog.2023.70>, 2023.
- 775
- Markus, T., Neumann, T., Martino, A., Abdalati, W., Brunt, K., Csatho, B., Farrell, S., Fricker, H., Gardner, A., Harding, D. and Jasinski, M.: The Ice, Cloud, and land Elevation Satellite-2 (ICESat-2): science requirements, concept, and implementation. *Remote Sens. Environ.*, 190, 260–273, <https://doi.org/10.1016/j.rse.2016.12.029>, 2017.
- Matsuoka, K., Forsberg, R., Ferraccioli, F., Moholdt, G., and Morlighem, M.: Circling Antarctica to unveil the bed below its icy edge, *Eos*, 103, <https://doi.org/10.1029/2022EO220276>, 2022.
- 780
- [Mälicke, M.: SciKit-GStat 1.0: a SciPy-flavored geostatistical variogram estimation toolbox written in Python. \*Geosci. Model Dev.\*, 15\(6\), 2505–2532, https://doi.org/10.5194/gmd-15-2505-2022, 2022.](https://doi.org/10.5194/gmd-15-2505-2022)
- Medley, B., Lenaerts, J.T.M., Dattler, M., Keenan, E. and Wever, N.: Predicting Antarctic net snow accumulation at the kilometer scale and its impact on observed height changes. *Geophys. Res. Lett.*, 49(20), <https://doi.org/10.1029/2022GL099330>, 2022.
- 785

- ~~Miles, B.W., Stokes, C.R., Jamieson, S.S., Jordan, J.R., Gudmundsson, G.H. and Jenkins, A.: High spatial and temporal variability in Antarctic ice discharge linked to ice shelf buttressing and bed geometry. *Sci. Rep.*, 12(1), 10968, <https://doi.org/10.1038/s41598-022-13517-2>, 2022.~~
- 790 Moholdt, G., Nuth, C., Hagen, J.O., Kohler, J.: Recent elevation changes of Svalbard glaciers derived from ICESat laser altimetry. *Remote Sens. Environ.* 114(11), 2756-2767, <https://doi.org/10.1016/j.rse.2010.06.008>, 2010.
- Moon, J., Lee, H. and Lee, H.: Elevation Change of Cooke2 Subglacial Lake in East Antarctica Observed by DInSAR and Time-Segmented PSInSAR. *Remote Sens.*, 14(18), 4616, <https://doi.org/10.3390/rs14184616>, 2022.
- Morlighem, M.: MEaSUREs BedMachine Antarctica, Version 3. Boulder, Colorado USA. NASA National Snow and Ice Data Center Distributed Active Archive Center. Date Accessed 11-22-2023, <https://doi.org/10.5067/FPSU0V1MWUB6>, 2022.
- 795 Mouginit, J., B. Scheuchl, and E. Rignot.: ~~2017~~-MEaSURE's Antarctic Boundaries for IPY 2007-2009 from Satellite Radar, Version 2. Boulder, Colorado USA. NASA National Snow and Ice Data Center Distributed Active Archive Center., ~~doi:~~<http://dx.doi.org/10.5067/AXE4121732AD>, 2017.
- 800 Neckel, N., Franke, S., Helm, V., Drews, R. and Jansen, D.; Evidence of Cascading Subglacial Water Flow at Jutulstraumen Glacier (Antarctica) Derived From Sentinel-1 and ICESat-2 Measurements. *Geophys. Res. Lett.*, 48(20), <https://doi.org/10.1029/2021GL094472>, 2021.
- ~~Nilsson, J., Gardner, A. S., and Paolo, F. S.: Elevation change of the Antarctic Ice Sheet: 1985 to 2020, *Earth Syst. Sci. Data*, 14, 3573–3598, <https://doi.org/10.3189/002214308784886171>, 2022.~~
- ~~Pattyn, F.: Investigating the stability of subglacial lakes with a full Stokes ice sheet model. *J. Glaciol.*, 54(185), 353–361, 2008.~~
- 805 Pattyn, F.: Antarctic subglacial conditions inferred from a hybrid ice sheet/ice stream model. *EPSL* 295(3-4), 451-461, <https://doi.org/10.1016/j.epsl.2010.04.025>, 2010.
- Pattyn, F., Carter, S.P. and Thoma, M.: Advances in modelling subglacial lakes and their interaction with the Antarctic ice sheet. *Philos Trans A Math Phys Eng Sci*, 374(2059), <https://doi.org/10.1098/rsta.2014.0296>, 2016.
- 810 ~~Pratap, B., Dey, R., Matsuoka, K., Moholdt, G., Lindbäck, K., Goel, V., Laluraj, L., Thamban, M.: Three-decade spatial patterns in surface mass balance of the Nivlisen Ice Shelf, central Dronning Maud Land, East Antarctica. *J. Glac.*, 68(267), <https://doi:10.1017/jog.2021.93>, 2022.~~
- Priergaard Zinck, A., Wouters, B., Lambert, E., Lhermitte, S.; Unveiling spatial variability within the Dotson Melt Channel through high-resolution basal melt rates from the Reference Elevation Model of Antarctica. *The Cryosphere* 17(9) 3785-3801, <https://doi.org/10.5194/tc-17-3785-2023>, 2023.
- 815 Rignot, E., Mouginit, J., and Scheuchl, B.: MEaSUREs Antarctic Grounding Line from Differential Satellite Radar Interferometry, Version 2. Boulder, Colorado USA. NASA National Snow and Ice Data Center Distributed Active Archive Center. <https://doi.org/10.5067/IKBWW4RYHF1Q>, 2016.
- Robel, A.A., Wilson, E. and Seroussi, H.: Layered seawater intrusion and melt under grounded ice. *The Cryosphere*, 16(2), 451-469, <https://doi.org/10.5194/tc-16-451-2022>, 2022.

- 820 Scambos, T.A, Berthier, E., Shuman, C.A.: The triggering of subglacial lake drainage during rapid glacier drawdown: Crane Glacier, Antarctic Peninsula. *Ann. Glaciol.* 52(59), 74-82, <https://doi.org/10.3189/172756411799096204>, 2011.
- ~~Schodlok, M.P., Menemenlis, D. and Rignot, E.J.: Ice shelf basal melt rates around Antarctica from simulations and observations. *J. Geophys. Res. Oceans*, 121(2), 1085-1109, <https://doi.org/10.1002/2015JC011117>, 2016.~~
- 825 [Schutz, B.E., Zwally, H.J., Shuman, C.A., Hancock, D. and DiMarzio, J.P.: Overview of the ICESat mission. \*Geophysical research letters\*, 32\(21\), <https://doi.org/10.1029/2005GL024009>, 2005.](https://doi.org/10.1029/2005GL024009)
- Sergienko, O.V., MacAyeal, D.R. and Bindschadler, R.A.: Causes of sudden, short-term changes in ice-stream surface elevation. *Geophys. Res. Lett.*, 34(22), <https://doi.org/10.1029/2007GL031775>, 2007.
- Shackleton, C., Matsuoka, K., Moholdt, G., Van Liefferinge, B. and Paden, J.: Stochastic simulations of bed topography constrain geothermal heat flow and subglacial drainage near Dome Fuji, East Antarctica. *J. Geophys. Res.*, 128(11),
- 830 <https://doi.org/10.1029/2023JF007269>, 2023.
- Shean, D.E., Joughin, I.R., Dutrieux, P., Smith, B.E. and Berthier, E.: Ice shelf basal melt rates from a high-resolution digital elevation model (DEM) record for Pine Island Glacier, Antarctica. *The Cryosphere*, 13(10), 2633-2656, <https://doi.org/10.5194/tc-13-2633-2019>, 2019.
- Shreve, R.L.: Movement of water in glaciers. *J. Glaciol.*, 11(62), 205-214, <https://doi.org/10.3189/S002214300002219X>, 1972.
- 835 Siegfried, M., Fricker, H.A., Carter, S.P., Tulaczyk, T.: Episodic ice velocity fluctuations triggered by a subglacial flood in West Antarctica. *Geophys. Res. Lett.*, 43(6), 2640-2648, <https://doi.org/10.1002/2016GL067758>, 2016.
- Siegfried, M.R. and Fricker, H.A.: Thirteen years of subglacial lake activity in Antarctica from multi-mission satellite altimetry. *Ann. Glaciol.*, 59(76pt1), 42-55, <https://doi.org/10.1017/aog.2017.36>, 2018.
- Siegfried, M.R. and Fricker, H.A.: Illuminating active subglacial lake processes with ICESat-2 laser altimetry. *Geophys. Res. Lett.*, 48(14), <https://doi.org/10.1029/2020GL091089>, 2021.
- 840 Smith, B.E., Fricker, H.A., Joughin, I.R., and Tulaczyk, S.: An inventory of active subglacial lakes in Antarctica detected by ICESat (2003-2008). *J. Glac.*, 2009. 55(192), 573-595, <https://doi.org/10.3189/002214309789470879>, 2009.
- Smith, B.E., Gourmelen, N., Huth, A. and Joughin, I.: Connected subglacial lake drainage beneath Thwaites glacier, west Antarctica. *The Cryosphere*, 11(1), 451-467, <https://doi.org/10.5194/tc-11-451-2017>, 2017.
- 845 Smith, B.E., Fricker, H.A., Gardner, A.S., Medley, B., Nilsson, J., Paolo, F.S., Holschuh, N., Adusumilli, S., Brunt, K., Csatho, B. and Harbeck, K.: Pervasive ice sheet mass loss reflects competing ocean and atmosphere processes. *Science*, 368(6496), 1239-1242, <https://doi.org/10.1126/science.aaz5845>, 2020.
- [Smith, B.E, Dickinson, S., Jelley, B. P., Neumann, T. A., Hancock, D., Lee, J. & Harbeck, K.: ATLAS/ICESat-2 L3B Slope-Corrected Land Ice Height Time Series. \(ATL11, Version 6\). Boulder, Colorado USA. NASA National Snow and Ice Data Center Distributed Active Archive Center. Date Accessed 11-01-2023, <https://doi.org/10.5067/ATLAS/ATL11.006>, 2023a.](https://doi.org/10.5067/ATLAS/ATL11.006)
- 850

- Smith, B.E., Medley, B., Fettweis, X., Sutterley, T., Alexander, P., Porter, D. and Tedesco, M.: Evaluating Greenland surface-mass-balance and firn-densification data using ICESat-2 altimetry. *The Cryosphere*, 17(2), 789-808, <https://doi.org/10.5194/tc-17-789-2023>, 2023b.
- 855 Stearns, L.A., Smith, B.E., and Hamilton, G.S.: Increased flow speed on a large East Antarctic outlet glacier caused by subglacial floods. *Nat. Geosci.*, 2008. 1(12): 827-831, <https://doi.org/10.1038/ngeo356>, 2008.
- Tarboton, D.G.: A new method for the determination of flow directions and upslope areas in grid digital elevation models. *Water Resour. Res.*, 33(2), 309-319, <https://doi.org/10.1029/96WR03137>, 1997.
- ~~Trusel, L.D., Frey, K.E., Das, S.B., Munneke, P.K. and Van Den Broeke, M.R.: Satellite based estimates of Antarctic surface meltwater fluxes. *Geophys. Res. Lett.*, 40(23), 6148–6153, <https://doi.org/10.1002/2013GL058138>, 2013.~~
- 860 ~~Wadham, J.L., De'ath, R., Monteiro, F.M., Tranter, M., Ridgwell, A., Raiswell, R. and Tulaczyk, S.: The potential role of the Antarctic Ice Sheet in global biogeochemical cycles. *Earth Environ. Sci. Trans.*, 104(1), 55-67, <https://doi.org/10.1017/S1755691013000108>, 2013.~~
- Whiteford, A., Horgan, H.J., Leong, W.J. and Forbes, M.: Melting and refreezing in an ice shelf basal channel at the grounding line of the Kamb Ice Stream, West Antarctica. *J. Geophys. Res.*, 127(11), <https://doi.org/10.1029/2021JF006532>, 2022.
- 865 Wright, A., & Siegert, M.: A fourth inventory of Antarctic subglacial lakes. *Ant. Sci.* 24(6), 659-664. <https://doi.org/10.1017/S095410201200048X>, 2012.
- ~~Zwally, H. J., Schutz, B., Abdalati, W., Abshire, J., Bentley, C., Brenner, A., Bufton, J., Dezio, J., Hancock, D., Harding, D., Herring, T., Minster, B., Quinn, K., Palm, S., Spinhirne, J., and Thomas, R.: ICESat's laser measurements of polar ice, atmosphere, ocean, and land, *J. Geodyn.*, 34, 405–445, [https://doi.org/10.1016/S0264-3707\(02\)00042-X](https://doi.org/10.1016/S0264-3707(02)00042-X), 2002.~~
- 870

## Supplementary Information

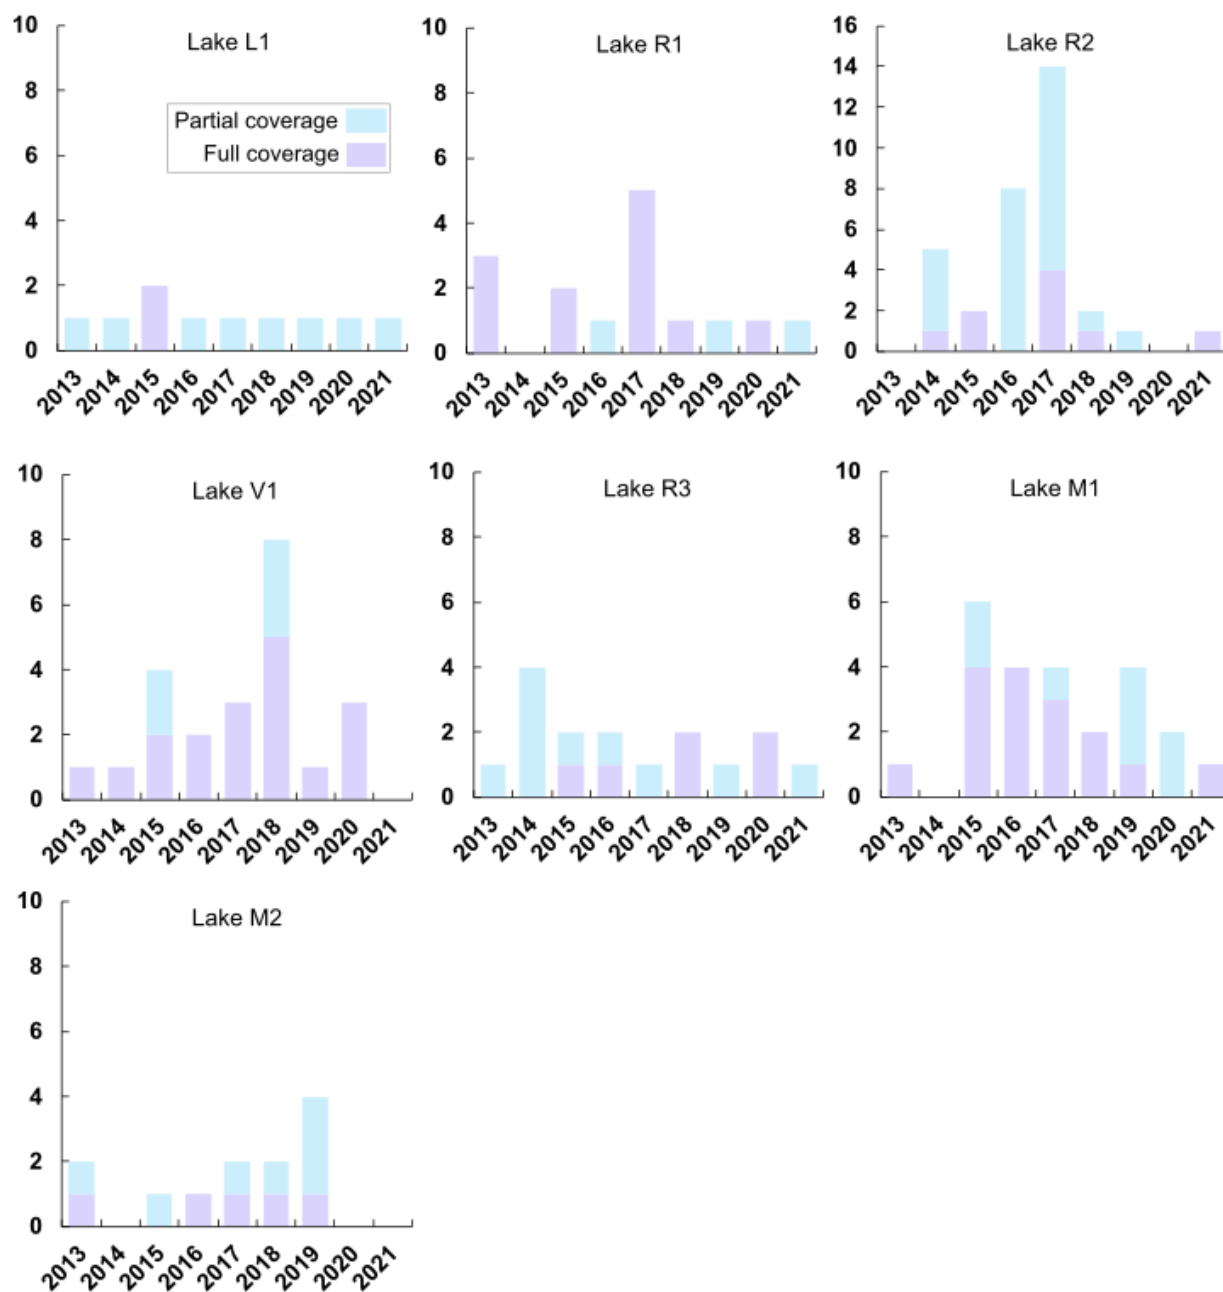

875 Supplementary Figure 1: Availability of time-stamped 2-m REMA strips over lakes identified from satellite altimetry, coloured according to partial coverage (blue) or full coverage (purple) of each lake.



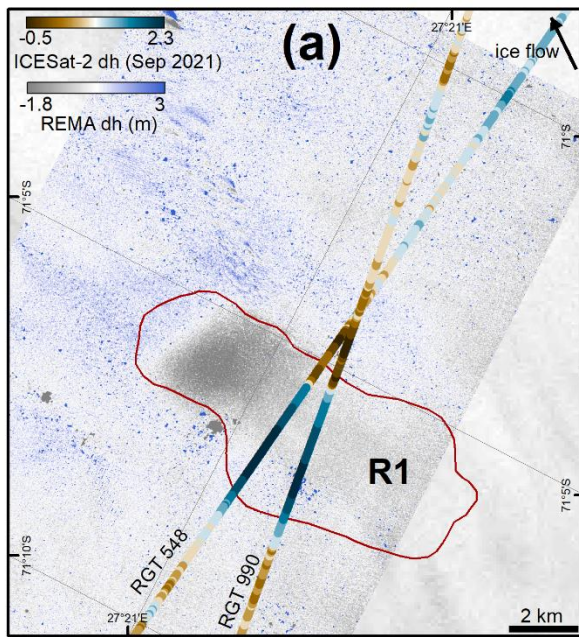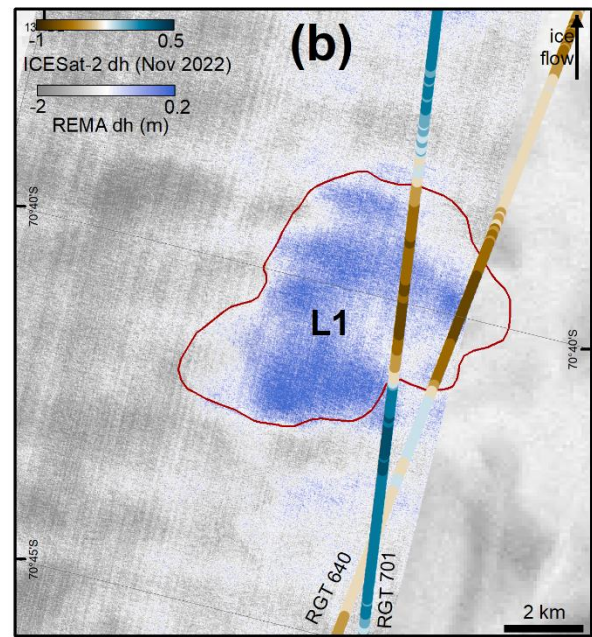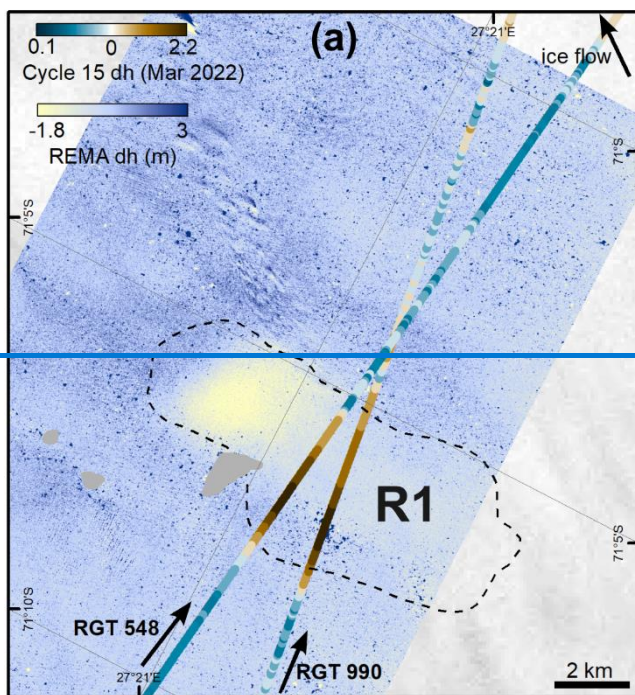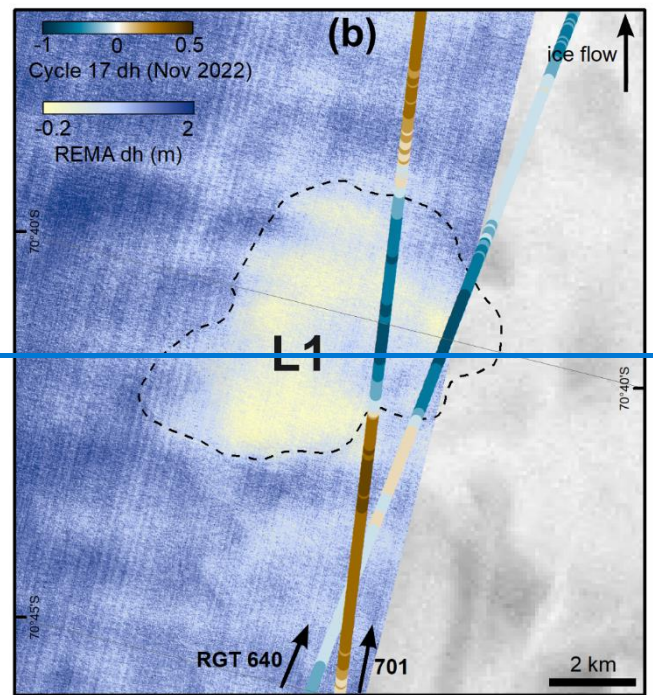

Supplementary Fig. 2: Ice surface elevation change from REMA strip differencing for Lakes R1 (a) and L1 (b). Regions of ice surface subsidence (yellow shading) between time-stamped REMA strip pairs (7<sup>th</sup> December 2016 – 21<sup>st</sup> December 2017 and 12<sup>th</sup> September 2015 – 10<sup>th</sup> December 2016) are delineated by the dashed lines. Each example highlights the spatial cooccurrence between localised

ice surface subsidence and surface elevation anomalies along the intersecting ICESat-2 tracks, suggesting Lakes R1 and L1 were draining during the period bounded by the REMA strip pairs.

885

890

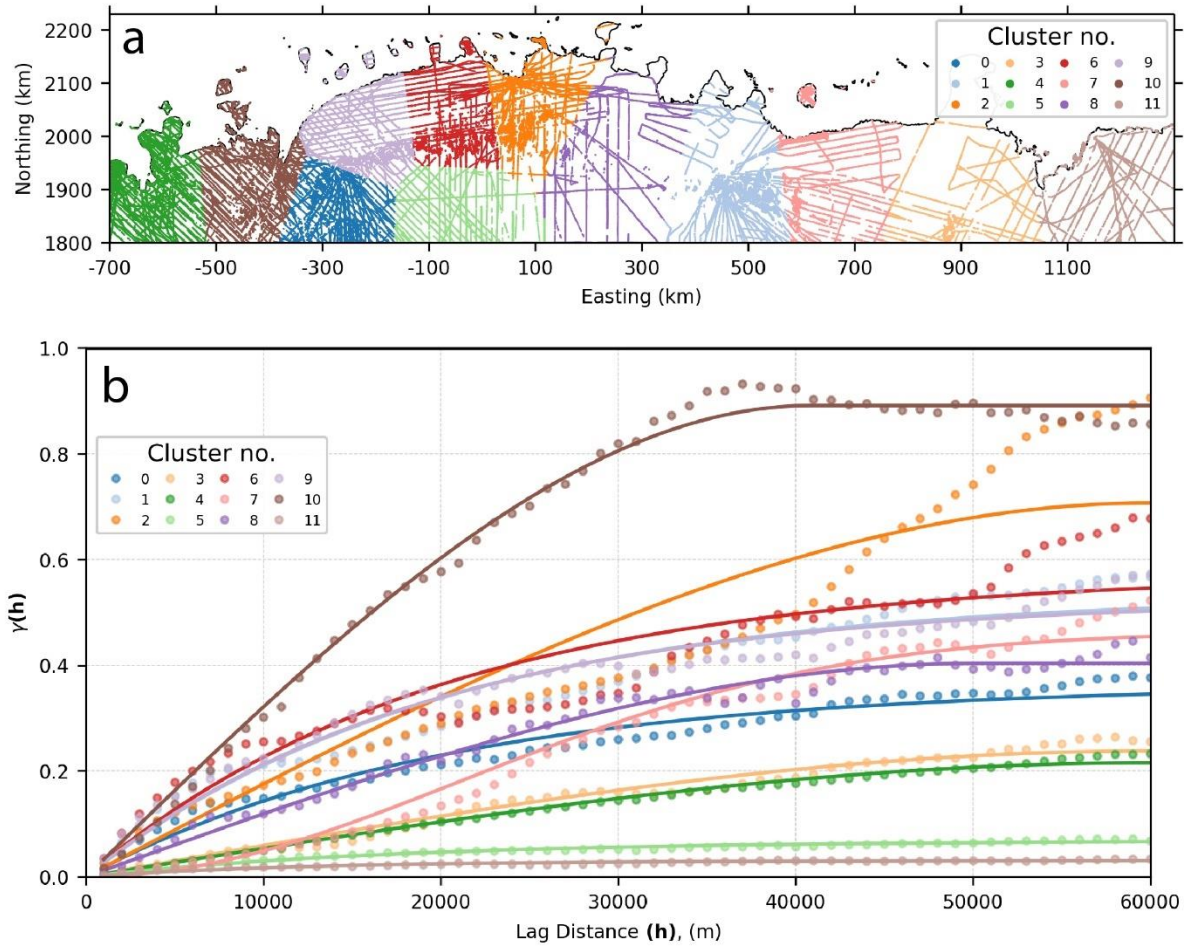

895

**Supplementary Figure 3: Clustered bed elevation data and associated variograms.** a) Map showing the radar-survey derived bed elevation data divided into 12 regional clusters using a k-means clustering algorithm on measurement coordinates. Map is in a polar stereographic projection with true scale latitude of -71 and central longitude of 10 degrees. b) -with associated variograms plotted below. Experimental variogram (points) and modelled variogram (curves) are shown for normalised bed elevations in each of the 12 regions. The best-fitting model types are either exponential (clusters 0,5,6,9,11), spherical (clusters 1,2,3,4,8,10) and/or Gaussian (cluster 7).



900

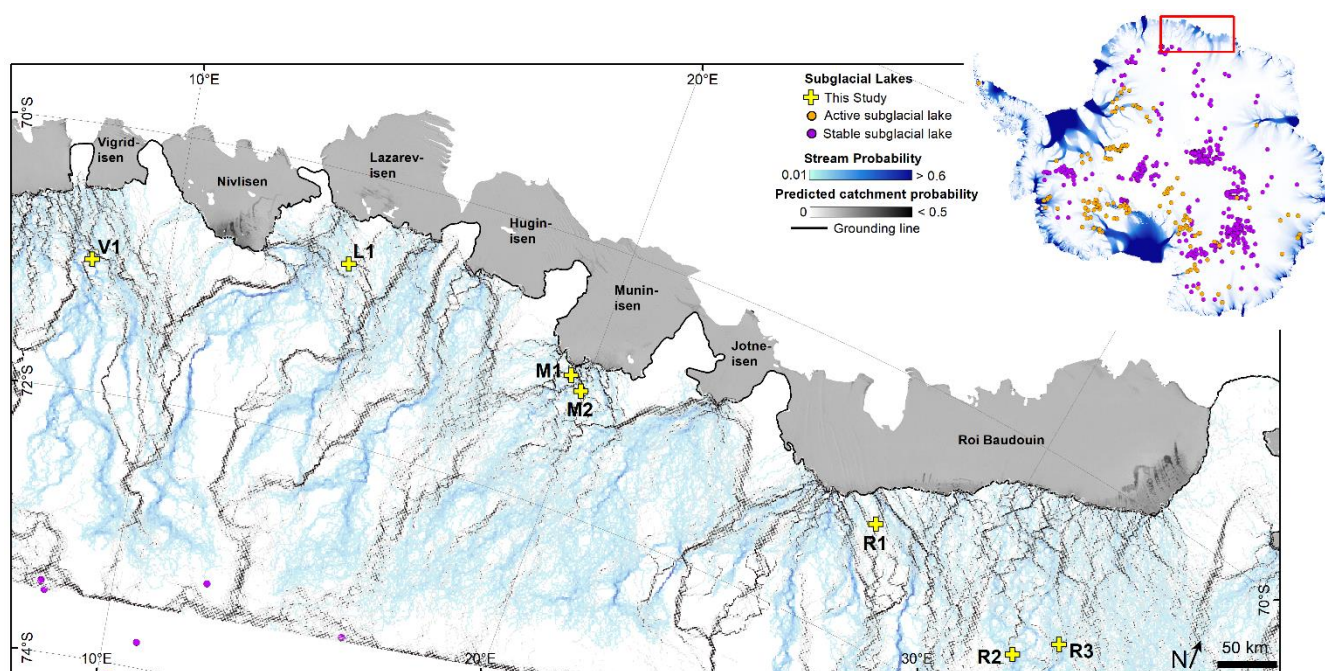

**Supplementary Figure 4: Probability of subglacial drainage catchment boundaries derived from water routing analyses over the ensemble of 50 stochastic bed simulations. The dashed black line is the MEaSUREs grounding line (Rignot et al., 2016) and ice-shelf imagery is from the MODIS mosaic (Haran et al., 2021). Subglacial lake locations depicted in the inset map are from Livingstone et al. (2022), where active lakes are represented by orange dots and stable lakes by green dots. Simulations of subglacial water drainage pathways are limited to ca.  $<73^\circ$ .**

905

910

915

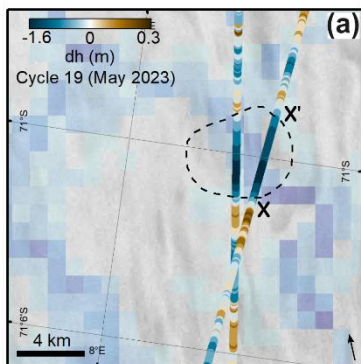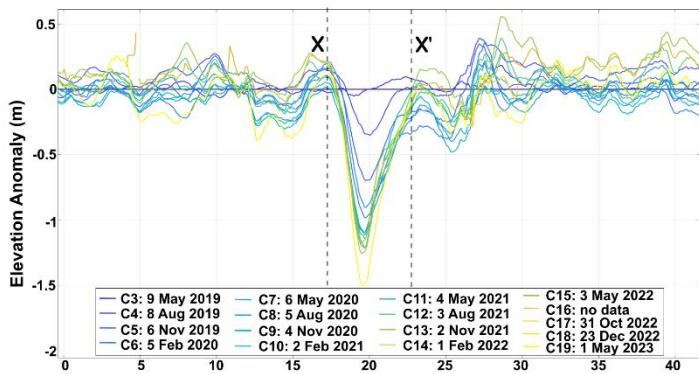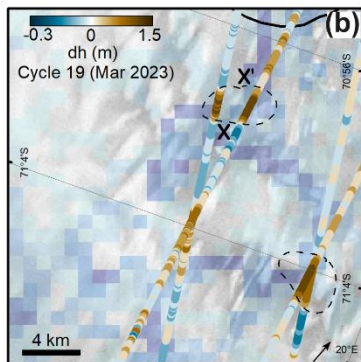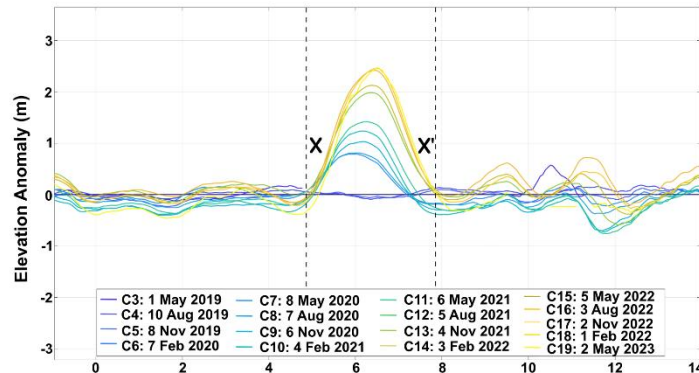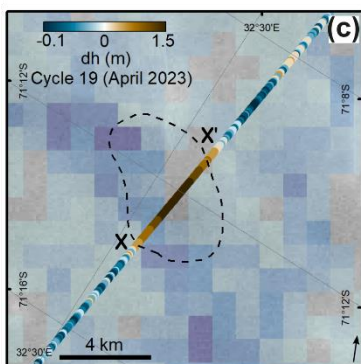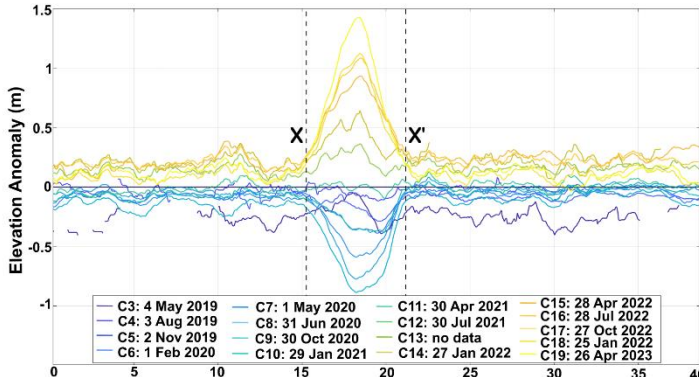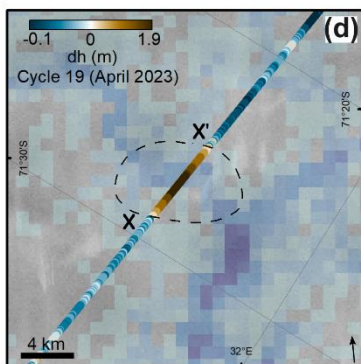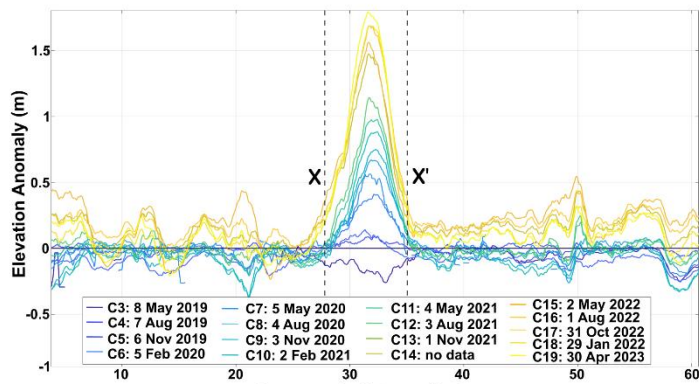

Along-track distance (km)

Supplementary Figure 56: Ice surface elevation displacements for Lakes V1, M1, M2, R2 and R3 derived from ICESat-2. Transects X-X' in each panel highlight significant (>1 m) ice surface elevation anomalies along ICESat-2 tracks. Graphs show along-track ice surface elevation displacements relative to ICESat-2 Cycle 3 (April/May 2019). Colours correspond to individual ICESat-2 cycles.

920

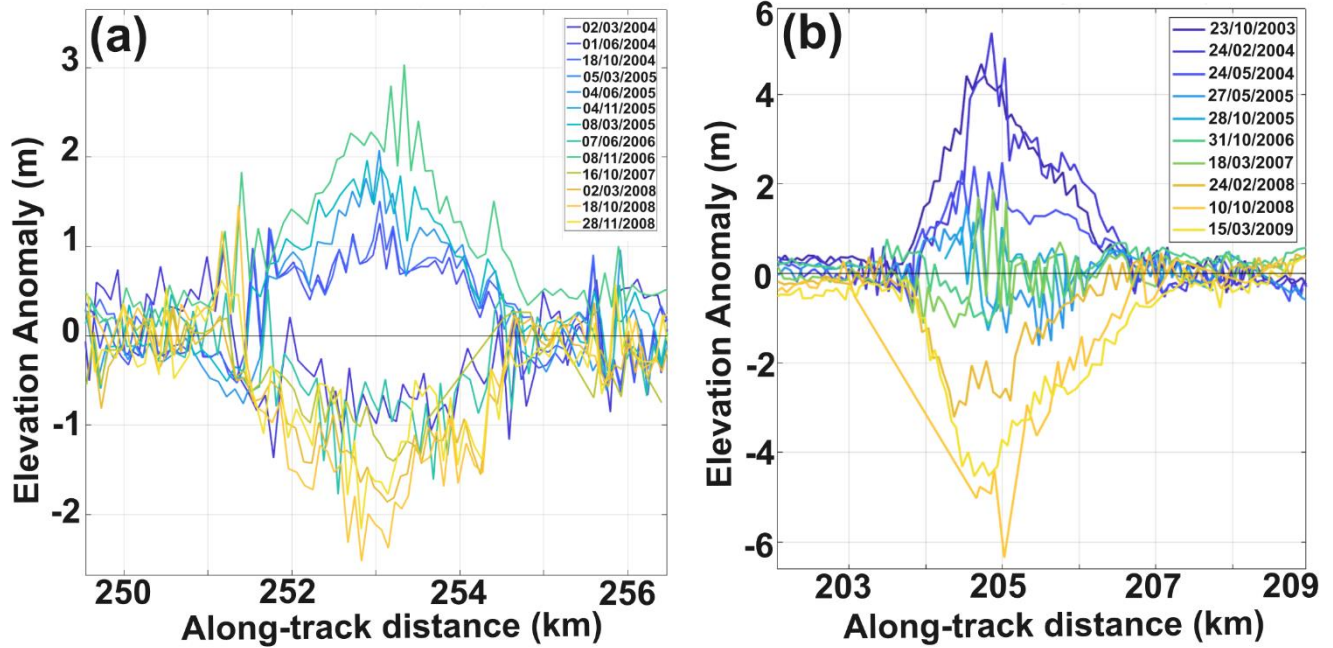

925 Supplementary Figure 67: Ice surface elevation displacement anomalies from two ICESat tracks over Lake R1 (a, Track 21) and Lake L1 (b, Track 134). Elevation anomalies are calculated with respect to surface plane fits representing averaged surface elevation.

930



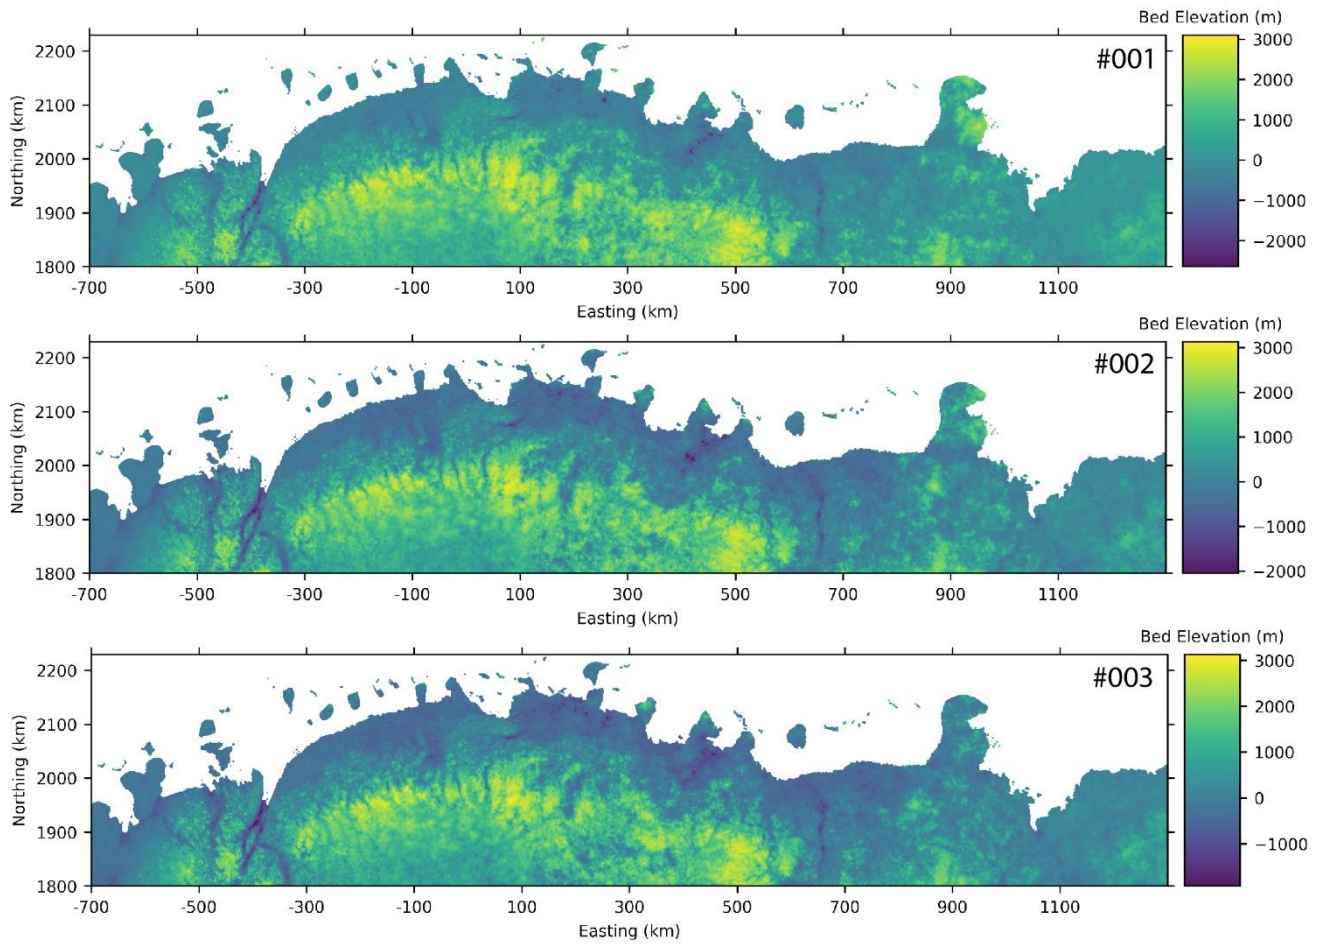

**Supplementary Figure 7: Example of Three simulated bed elevation results 001-003 out of the ensemble of 50 equally-likely grids examples of simulated bed topography grids. Map is in a polar stereographic projection with true scale latitude of -71 and central longitude of 10 degrees.**

935



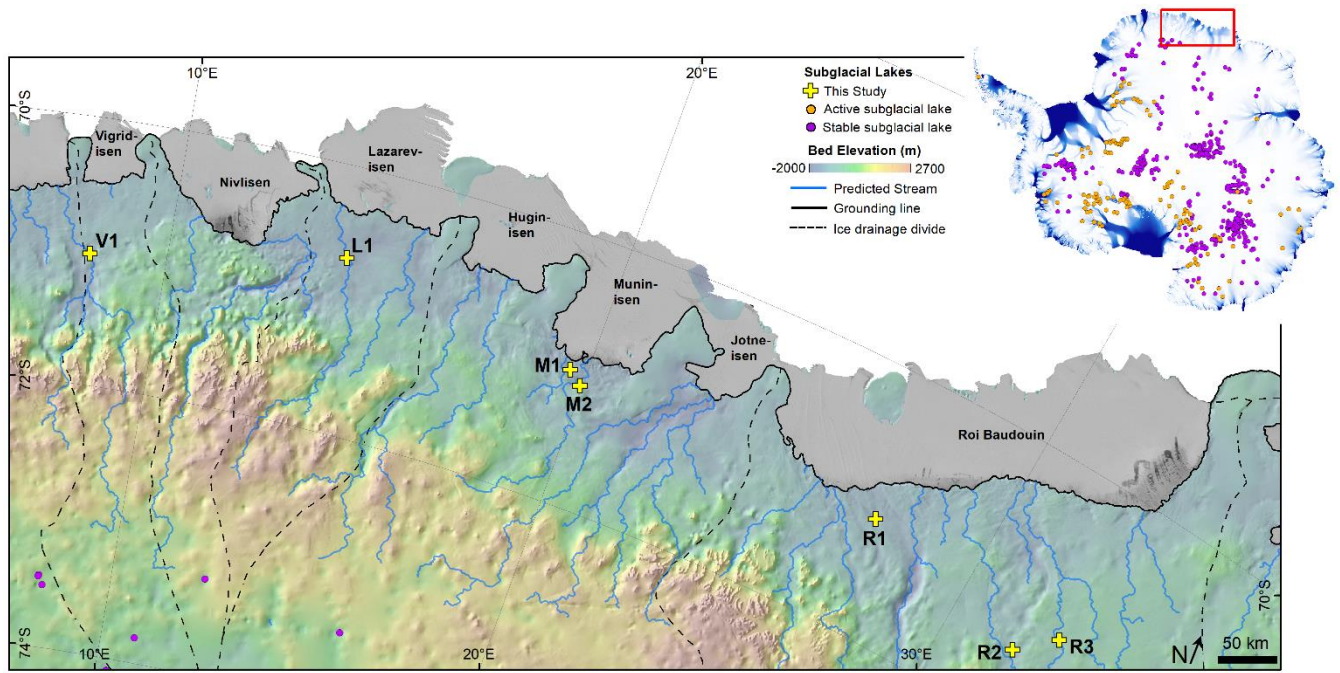

940 **Supplementary Figure 8: Example of predicted streams from water routing analysis for one of 50 stochastic simulations. Newly-**  
 945 **identified active lakes in this study are shown in yellow and previously identified subglacial lakes from Goeller et al. (2016) are**  
**shown in purple. The dashed black line is the MEaSUREs grounding line (Rignot et al., 2016) and the bed elevations are from**  
**BedMachine (Morlighem et al., 2022). Ice-shelf imagery is from the MODIS mosaic (Haran et al., 2021). Subglacial lake locations**  
**depicted in the inset map are from Livingstone et al. (2022), where active lakes are represented by orange dots and stable lakes by**  
**green dots. [Simulations of subglacial water drainage pathways are limited to ca. <math>73^{\circ}</math>.](#)**

950 **[Supplementary Figure 6: Probability of subglacial drainage basin boundaries over the ensemble of 50 stochastic simulations derived](#)**  
**[from water routing analysis. The dashed black line is the MEaSUREs grounding line \(Rignot et al., 2016\) and ice-shelf imagery is](#)**  
**[from the MODIS mosaic \(Haran et al., 2021\). Subglacial lake locations depicted in the inset map are from Livingstone et al. \(2022\),](#)**  
**[where active lakes are represented by orange dots and stable lakes by green dots.](#)**

955

960

965 **Supplementary Table 1: Details of time-stamped 2-m REMA strips used for DEM differencing, including vertical elevation bias from co-registration with ICESat-2 (calculated as the average difference between DEM strip elevations and closest contemporaneous ICESat-2 elevations along overlapping ICESat-2 tracks), standard deviation in elevation bias and time difference between REMA strip acquisition date and the closest contemporaneous ICESat-2 elevation data. Elevation bias and time difference could not be calculated for the four last strips due to lacking contemporaneous ICESat-2 data.**

| <b>REMA Strip Date</b>          | <b>Location</b>        | <b>Satellite</b> | <b>Elevation bias<br/>from ICESat-2 (m)</b> | <b><math>\sigma</math> (m)</b> | <b>Time difference<br/>(days)</b> |
|---------------------------------|------------------------|------------------|---------------------------------------------|--------------------------------|-----------------------------------|
| 22 <sup>nd</sup> October 2019   | Roi Baudouin Ice Shelf | Worldview-1      | -0.70                                       | 0.52                           | 69                                |
| 10 <sup>th</sup> January 2021   | Roi Baudouin Ice Shelf | Worldview-2      | -2.41                                       | 1.20                           | 15                                |
| 18 <sup>th</sup> January 2021   | Roi Baudouin Ice Shelf | Worldview-1      | -0.98                                       | 0.29                           | 11                                |
| 28 <sup>th</sup> December 2022  | Roi Baudouin Ice Shelf | Worldview-1      | 0.52                                        | 0.24                           | 62                                |
| 25 <sup>th</sup> January 2020   | Lazarev Ice Shelf      | Worldview-1      | 3.53                                        | 0.42                           | 12                                |
| 15 <sup>th</sup> February 2021  | Lazarev Ice Shelf      | Worldview-3      | -2.10                                       | 0.42                           | 12                                |
| 12 <sup>th</sup> September 2015 | Lazarev Ice Shelf      | Worldview-1      | -                                           |                                | -                                 |
| 10 <sup>th</sup> December 2016  | Lazarev Ice Shelf      | Worldview-1      | -                                           |                                | -                                 |
| 7 <sup>th</sup> December 2016   | Roi Baudouin Ice Shelf | Worldview-1      | -                                           |                                | -                                 |
| 21 <sup>st</sup> December 2017  | Roi Baudouin Ice Shelf | Worldview-1      | -                                           |                                | -                                 |

970
